1     **Proteomic Profile of TGF- $\beta$ 1 treated Lung Fibroblasts identifies Novel Markers**  
2                   **of Activated Fibroblasts in the Silica Exposed Rat Lung**

3

4

5     Mao Na<sup>1\*</sup>, Xu Hong<sup>2\*</sup>, Jin Fuyu<sup>1</sup>, Xu Dingjie<sup>3</sup>, Dominic Sales<sup>4</sup>, Zhang Hui<sup>1</sup>, Wei Zhongqiu<sup>1</sup>, Li  
6     Shifeng<sup>2</sup>, Gao Xuemin<sup>2</sup>, Cai Wenchen<sup>5</sup>, Li Dan<sup>1</sup>, Zhang Guizhen<sup>1</sup>, Zhang Bonan<sup>5</sup>, Zhang Lijuan<sup>2</sup>,  
7     Li Shumin<sup>5</sup>, Zhu ying<sup>5</sup>, Wang Jin<sup>1</sup>, Rui Mingwang<sup>2</sup>, Ross Summer<sup>4</sup>, Yang Fang<sup>1,5#</sup>,

8

9     1. Basic Medical College, North China University of Science and Technology, Tangshan, China

10    2. Medical Research Center, North China University of Science and Technology, Tangshan, China

11    3. College of Traditional Chinese Medicine, North China University of Science and Technology,  
12    Tangshan, China

13    4. Center for Translational Medicine, Jane and Leonard Korman Respiratory Institute, Thomas  
14    Jefferson University, Philadelphia, PA, USA

15    5. School of public health, North China University of Science and Technology, Tangshan, China

16

17

18

19

20    \*co-first author

21

22    #corresponding author:

23    Fang Yang, M.D.

24    Basic Medical College, North China University of Science and Technology

25    No. 21 Bohai Road, Caofeidian Eco-city, Tangshan city, Hebei province 063000, China

26    Email: fangyang990404@sina.com

27

28 **ABSTRACT:** We performed liquid chromatography-tandem mass spectrometry  
29 (LC-MS/MS) on control and TGF- $\beta$ 1-exposed rat lung fibroblasts to identify proteins  
30 differentially expressed between cell populations. A total of 1648 proteins were found  
31 to be differentially expressed in response to TGF- $\beta$ 1 treatment and 196 proteins were  
32 expressed at  $\geq 1.2$  fold relative to control. Guided by these results, we next  
33 determined whether similar changes in protein expression were detectable in the rat  
34 lung after chronic exposure to silica dust. Of the five proteins selected for further  
35 analysis, we found that levels of all proteins were markedly increased in the  
36 silica-exposed rat lung, including the proteins for the very low density lipoprotein  
37 receptor (VLDLR) and the transmembrane (type I) heparin sulfate proteoglycan called  
38 syndecan 2 (SDC2). Because VLDLR and SDC2 have not, to our knowledge, been  
39 previously linked to the pathobiology of silicosis, we next examined whether  
40 knockdown of either gene altered responses to TGF- $\beta$ 1 in MRC-5 lung fibroblasts.  
41 Interestingly, we found knockdown of either VLDLR or SDC2 dramatically reduced  
42 collagen production to TGF- $\beta$ 1, suggesting that both proteins might play a novel role  
43 in myofibroblast biology and pathogenesis of silica-induced pulmonary fibrosis. In  
44 summary, our findings suggest that performing LC-MS/MS on TGF- $\beta$ 1 stimulated  
45 lung fibroblasts can uncover novel molecular targets of activated myofibroblasts in  
46 silica-exposed lung.

47 **Key words:** proteomics; fibroblast; silicosis; lung; pulmonary fibrosis

48

49 **Highlights:**

50 We identified 196 proteins differentially expressed between control and TGF- $\beta$ 1  
51 treated fibroblasts by LC-MS/MS.

52 Several proteins identified by LC-MS/MS were also found to be differentially  
53 expressed in whole lung tissues and isolated fibroblasts after chronic exposure to  
54 silica dust, including the very low density lipoprotein receptor (VLDLR) and the  
55 transmembrane type I heparan sulfate proteoglycan called syndecan 2

56 Knockdown of SDC2 or VLDLR markedly inhibited collagen production in MRC-5  
57 fibroblasts, suggesting a novel pathogenic role for these proteins in myofibroblast  
58 biology.

59

## INTRODUCTION

60 Silicosis is a highly prevalent occupational condition that is caused by chronic  
61 inhalation of crystalline silica particulates (aerodynamic diameter < 5  $\mu\text{m}$ ) into the  
62 distal air spaces of the lung. Though this disease is largely preventable by  
63 implementing strict safety and health standards at work, silicosis remains one of the  
64 more common occupational disorders in many parts of the world, including China.

65 Although silica dust has been shown to injure many cell types in the lung it is  
66 generally believed that activated myofibroblasts play a central role in driving the  
67 development of disease. Central to this activation is signaling through the  
68 transforming growth factor  $\beta 1$  (TGF- $\beta 1$ ) receptor, which leads to a cascade of events  
69 that trigger the transdifferentiation of fibroblasts to myofibroblasts and induce the  
70 production of large quantities of collagen and other extracellular matrix materials  
71 (Gauldie *et al.*, 1999; Harris *et al.*, 2013; Jagirdar *et al.*, 1996). Despite decades of  
72 work on TGF- $\beta 1$  signaling in lung fibroblasts much remains to be learned about  
73 molecular mechanisms controlling myofibroblast growth and activation. Moreover, it  
74 is largely believed by many experts in the field that gaining additional insight into  
75 biological events downstream of TGF- $\beta 1$  signaling could lead to the identification of  
76 new molecular targets for the treatment of silicosis and various other fibrotic lung  
77 conditions.

78 In our previous work, we utilized a 2-DE proteomic approach to identify novel  
79 biomarkers of silicosis (Xiaojun *et al.*, 2016). However, it is now clear that using  
80 isobaric tags for relative quantification (iTRAQ) has several advances over the 2-DE  
81 approach including higher throughput quantification, decreased analytical time, and  
82 lower run-to-run variation (Rauniyar *et al.*, 2014). With this in mind, the objective of  
83 this work was to utilize iTRAQ coupled liquid chromatography-tandem mass  
84 spectrometry (LC-MS/MS) to identify novel markers of activated rat lung fibroblasts  
85 and to utilize this information to assess whether similar markers were upregulated in  
86 the rat lung after chronic exposure to silica dust.

87

88

## MATERIALS AND METHODS

89 **Cell culture.** Rat lung fibroblasts were isolated from 1–3 day old Wistar rats as  
90 previously described (Xu *et al.*, 2012). Briefly, freshly isolated cells were culture for 3  
91 to 4 passages and then transferred to low serum conditions (0.5% FBS) for 24 h.  
92 Following serum deprivation, cellwere treated with 5 ng/ml TGF- $\beta$ 1 (240-B; R&D  
93 Systems, Inc., Minneapolis, MN, USA) or vehicle controlfor 24 h and whole cell  
94 lysates were collected for later analysis (Xiaojun, et al., 2016). For each group, cells  
95 from 10 independent samples were pooled for proteomics analysis.

96 Fibroblasts used in our studies were derived from the lungs of control and  
97 silica-exposed rats(Seluanov *et al.*, 2010) and the MRC-5 cell line. Fibroblasts were  
98 cultured in MEM containing 2% HEPES, 1% nonessential amino acid, and 10% FBS.  
99 Transient transfections were carried out using lipofectamine 2000 (Invitrogen, USA)  
100 according to the manufacturer’s recommendations. Knockdown was performed by  
101 exposing MRC-5 cells to 10 ng of siRNA targeting either very low-density lipoprotein  
102 receptor (VLDLR) or syndecan-2 (SDC2). Six hours after transfection, cells were  
103 washed and exposed to medium containing vehicle control or TGF- $\beta$ 1.

104 siRNAs used in our studies were derived from following sequences: 1) VLDL  
105 R-siRNA 1: GUGCAACAAUGGCCAGUGU dTdT; CACGUUGUUACCGGUCA  
106 CA dTdT; 2) VLDLR-siRNA 2: GCGAGUGCAUCCAUAAGAA dTdT; CGCU  
107 CACGUAGGUAUUCUU dTdT; 3) VLDLR-siRNA 3: GAUCGACAAUGUCUA  
108 UAAU dTdT; CUAGCUGUUACAGAUUUA dTdT; 4) SDC2-siRNA 1: CCA  
109 CGACGCUGAAUAUACA dTdT; GGUGCUGCGACUUAUAUGU dTdT; 5) SD  
110 C2-siRNA 2: GUUGGUGUAUCGCAUGAGA dTdT; CAACCACAUAGCGUAC  
111 UCU dTdT; 6) SDC2-siRNA 3: GGAGAACGCAAACCAUCCA dTdT; CCUCU  
112 UGCGUUUGGUAGGU dTdT.

113 **Sample preparation for LC-MS/MS analysis.** Proteins for LC-MS/MS were as  
114 prepared previously described (Wisniewski *et al.*, 2009)(Promega, Fitchburg,  
115 Wisconsin, USA). Briefly, cell lysates were loaded onto a 10-kDa filter unit (Pall  
116 Corp., Port Washington, New York, USA), and filter was sequentially washed with

117 UA (8 M urea in 0.1 M Tris-HCl; pH 8.5) and ABC (25 mM  $\text{NH}_4\text{HCO}_3$ ) buffers.  
118 Proteins in collected samples were then denatured in 20 mM DTT at 50°C for 1 h and  
119 carboxyamidomethylated with 50 mM iodoacetamide (IAA) for 45 min. This step was  
120 followed by a digestion step using Trypsin Gold (1:50) at 37°C overnight. Peptide  
121 fragments were next desalted using Oasis HLB cartridges (Waters, Milford,  
122 Massachusetts, USA), dried by vacuum centrifugation (Thermo Fisher Scientific,  
123 Bremen, Germany) and again collected as a filtrate. Finally, samples were labelled  
124 with 4-plex iTRAQ reagent (AB Sciex) according to the manufacture's protocol, with  
125 the control group labelled with tag 116 and TGF- $\beta$  group with tag 117.

126 **High-performance liquid chromatography (HPLC) separation.** Pooled mixtures  
127 of labelled samples were fractionated using a high-pH HPLC on a Waters Xbridge  
128 C18 column (4.6 mm  $\times$  250 mm, 3  $\mu\text{m}$ ). Samples were loaded onto a column  
129 equilibrated in buffer A1 ( $\text{H}_2\text{O}$ ; pH10), with an elution gradient of 5 – 25% buffer B1  
130 (90% ACN; pH10) and a flow rate = 1 mL/min for 60 min. Flow-through was  
131 collected at 1 minute intervals for a total of 60 fractions. Solutions were then dried,  
132 re-suspended in 0.1% formic acid, and pooled by concatenating fractions 1, 31; 2, 32;  
133 and so on. Analyses were performed on just odd number fractions.

134 **LC-MS/MS analysis.** Each fraction was analysed with a reverse-phase-C18  
135 self-packed capillary LC column (75  $\mu\text{m}$   $\times$  100 mm), with an elution gradient of 5% –  
136 30% buffer B2 (0.1% formic acid, 99.9% ACN; flow rate = 0.3  $\mu\text{L}/\text{min}$ ) for 40 min. A  
137 Triple TOF 5600 mass spectrometer was used to analyze the eluted peptides, with  
138 each fraction run in duplicate. The MS data were acquired using the high-sensitivity  
139 mode with the following parameters: 30 data-dependent MS/MS scans per full scan;  
140 full scans acquired at a resolution of 40,000 and MS/MS scans at a resolution of  
141 20,000; rolling collision energy, charge state screening (including precursors with a  
142 charge state of +2 to +4), and dynamic exclusion (exclusion duration 15 s); and a  
143 MS/MS scan range of 100 – 1800 m/z, with a scan time of 100 ms.

144 **Date analysis.** Data acquired from LC-MS/MS were analysed using the Mascot  
145 software (version 2.4.1, Matrix Science, London, UK). Proteins were identified by

146 searching peptide spectral matches against the Swissprot\_2014\_07 database  
147 (taxonomy: Rattus, containing 7,906 sequences). The parameters utilized included  
148 trypsin as the digestion enzyme, two or fewer missed cleavage sites and cysteine  
149 carbamidomethylation (57.02146) as a fixed modification. The precursor ion mass  
150 tolerance and the fragment ion mass tolerance were set to ppm and 0.05 Da  
151 respectively. Protein identifications from Mascot were validated using the Scaffold  
152 Proteome Software (version 4.3.3, Proteome Software Inc., Portland, OR). Peptide  
153 identifications were accepted if false discovery rate (FDR) was less than 1.0% and if  
154 at least 2 unique peptides were identified from the same protein. iTRAQ, Scaffold Q+  
155 was used for Label Based Quantification (TMT, iTRAQ, SILAC, etc.) of peptides and  
156 proteins. For each channel, the acquired reporter ion intensities were normalized by  
157 the sum of all reporter ion intensities of that channel. Normalized intensities were then  
158 used to calculate the relative protein abundance and quantify protein  
159 ratios(Nesvizhskii *et al.*, 2003). Proteins identified from these analyses were further  
160 analysed to determine function, ontology and location using the PANTHER  
161 classification system (Protein Analysis Through Evolutionary Relationships;  
162 <http://www.pantherdb.org/>) (Mi *et al.*, 2013).

163 **Silicosis model.** Male Wistar rats were purchased from Vital River Laboratory Animal  
164 Technology Co. Ltd. (SCXY 2009-0004; Beijing, China) and all experiments were  
165 performed in accordance with the regulations set by the Committee on the Ethics of  
166 North China University of Science and Technology. Silica dust was delivered to rats  
167 using a HOPE MED 8050 exposure control apparatus (HOPE Industry and Trade Co.  
168 Ltd, Tianjin, China) with the SiO<sub>2</sub>(s5631, Sigma-Aldrich, St. Louis, MO, USA)  
169 concentration maintained at 2,000 mg/m<sup>3</sup> (Liu *et al.*, 2017). At experimental endpoints,  
170 bronchoalveolar lavage was performed with 0.9% saline and whole lung tissues were  
171 then snap-frozen in liquid nitrogen.

172 **Immunohistochemistry (IHC).**Paraffin-embedded tissue sections were used for IHC.  
173 Endogenous peroxidases were quenched with 3% H<sub>2</sub>O<sub>2</sub> and antigen retrieval was  
174 performed using a high-pressure method with deparaffinised sections. The samples

175 were then incubated with primary antibodies against collagen V (COL V, A1515,  
176 ABclonal Biotech, Wuhan, China), collagen XI (COL XI, DF3553, Affinity  
177 Biosciences, Cincinnati, OH, USA), VLDLR (TA309928, OriGene Technologies,  
178 Rockville, MD, USA) or SDC2 (A1810, ABclonal Biotech, Wuhan, China) at 4°C  
179 overnight. The following morning, tissue sections were incubated with secondary  
180 antibody conjugated with the horseradish peroxidase enzyme (PV-6000; Beijing  
181 ZhongshanJinqiao Biotechnology Co. Ltd, China) at 37°C for 20 min.  
182 Immunoreactivity was visualised with using the DAB substrate (ZLI-9018;  
183 ZSGB-BIO, Beijing, China) and the nuclei were stained with hematoxylin.

184 **Western blot analysis.** Total protein levels were quantified using a Bradford assay  
185 (PC0020; Solarbio, China) as previously described. Protein lysates (20 µg/lane) were  
186 separated on a 13% gel by SDS-PAGE and were electro-transferred onto  
187 polyvinylidene fluoride (PVDF) membranes (Amersham Biosciences). The  
188 membranes were blocked with 5% non-fat milk and incubated with primary  
189 antibodies against COL V, COL XI, Vascular cell adhesion protein (VCAM, ab134047,  
190 Abcam, Cambridge, MA, USA), Transmembrane protein 214 (TM214, TS306822,  
191 OriGene Technologies, Rockville, MD, USA), VLDLR, SDC-2 or  $\alpha$ -SMA at 4°C  
192 overnight. Membranes were next washed in TBST and incubated with  
193 peroxidase-labelled affinity-purified anti-rabbit/mouse IgG (H + L) secondary  
194 antibody (074–1506/074–1806; Kirkegard and Perry Laboratories). Protein bands were  
195 visualised using ECL™ Prime Western Blotting Detection Reagent (RPN2232; GE  
196 Healthcare, Hong Kong, China) and expressed as a fold change relative to  $\alpha$ -Tubulin  
197 (Tub  $\alpha$ , AF7010; Affinity Biosciences, Cincinnati, OH, USA).

198 **Statistical analysis.** Comparisons between two groups were performed using  
199 independent sample *t*-test. Comparisons between multiple independent groups were  
200 done using a one-way ANOVA followed by a post-hoc analysis with the Bonferroni  
201 test. Values were expressed as a means  $\pm$  Std, with p-values less than 0.05 considered  
202 as statistically significant.

203



204

## RESULTS

205 **Proteomic profile differs between control and TGF- $\beta$ 1 lung fibroblasts.** To identify  
206 proteins differentially expressed between control and activated fibroblasts, we  
207 performed iTRAQ coupled with LC-MS/MS on rat lung fibroblasts treated with or  
208 without TGF- $\beta$ 1 for 24 h. Using scaffold integration, we observed a total of 1648  
209 proteins differentially expressed between control and TGF- $\beta$ 1 treated cells. Moreover,  
210 196 of these proteins were expressed at  $\geq 1.2$  fold-change (Tables S1 and S2) and 20  
211 proteins exhibited a  $\geq 1.5$  fold-change (Table 1) relative to control.

212 **Bioinformatic analyses of differentially expressed proteins in control and TGF- $\beta$ 1**  
213 **stimulated lung fibroblasts.** Proteins whose expression changed most significantly  
214 after exposure to TGF- $\beta$ 1 were classified into functional classes using the PANTHER  
215 analysis. Gene ontology (GO) analysis classified proteins into three distinct categories  
216 entitled: 1) molecular function; 2) biological process; and 3) components of the cell.  
217 Among these categories most proteins were belonged to molecular functions group  
218 (Table S3), and the major subgroups within this category included: 1) catalytic  
219 activity (40%); 2) protein binding (26%), and 3) structural activity (20%). In the  
220 biological processes category (Table S4), most proteins belonged to the subgroups: 1)  
221 cellular process (26%); 2) metabolic process (22%), or 3) cellular  
222 component/biogenesis (10%) subgroup; and proteins within the components of a cell  
223 group belonged to 1) cell part (40%); 2) cellular organelle (25%); and 3)  
224 macromolecular complexes (18%) (Table S5).

225 Within PANTHER, class ontology was also performed (Table S6), with the largest  
226 number of proteins assigned to the following categories: 1) nucleic acid binding (18%);  
227 2) hydrolase (10%); 3) enzyme modulator and transferase (each 7%); 4) cytoskeletal  
228 protein (6%); 5) signalling molecule (6%); and 7) transfer/carrier protein (6%).  
229 Pathway analysis showed that all proteins that were differentially expressed in  
230 response to TGF- $\beta$ 1 fell into one of the following signalling pathways: 1) integrin; 2)  
231 angiogenesis; 3) CCKR; 4) conadotropin-releasing hormone receptor; 5) p53; 6)  
232 Alzheimer disease-presenilin; 7) blood coagulation; 8) cadherin; 9) cholesterol

233 biosynthesis; 10) FGF or 11) Wntsignalling pathways (Table S7).

234 **Proteins increased in TGF- $\beta$ 1 stimulated lung fibroblasts were also increased in**  
235 **the silica-exposed rat lung.** To determine whether in vitro findings were  
236 representative of changes in vivo, we next performed IHC and western blot analysis  
237 on control and silica-exposed lung tissues for those proteins whose expression  
238 changed most significantly ( $\geq 1.5$  fold increase) in response to TGF- $\beta$ 1 treatment.  
239 However, our analysis was limited to proteins in which a commercially available  
240 antibody for IHC or WB was available; this included the proteins COLV, COL XI,  
241 VCAM1, TM214, VLDLR, and SDC2 for protein identification.

242 As shown in Figure 1A, van Gieson (VG) staining confirmed the ability of our model  
243 to induce severe fibrotic responses in the rat lung as demonstrated by an increase in  
244 extracellular matrix deposition and the large number of silicotic nodules. Western blot  
245 analysis also showed an increase in COLI and  $\alpha$ -SMA in whole lung tissues and  
246 primary lung fibroblasts after silica exposure (Figure 1B).

247 As shown in Figure 2, Western blot analysis revealed a marked increase in the  
248 expression of COL V, COL XI, and VCAM1 in the lungs of silica exposed rats,  
249 including whole lung tissues and freshly isolated lung fibroblasts. Moreover, IHC  
250 staining of the lung showed the elevated levels of COL V and COL XI was confined  
251 mostly to the interstitium of the lung, particularly in areas with evidence of active  
252 inflammation and fibrosis. Despite multiple attempts, staining for VCAM1 was  
253 detected in either the control or the silica-exposed rat lung, indicating that our  
254 antibody could not be used for IHC.

255 In addition to the above proteins, we found that levels of VLDLR and SDC2 were  
256 also markedly increased by western blot in whole lung tissues and isolated fibroblasts  
257 after silica exposure. (Figure 3). Significant increases in VLDLR and SDC2  
258 expression were also observed by IHC in the silica-exposed lung.

259 **Knockdown of VLDLR or SDC2 reduces collagen deposition in**  
260 **TGF- $\beta$ 1stimulated fibroblasts.** Although not entirely surprising that collagen levels

261 COL V and COL XL) and VCAM expression(Agassandian *et al.*, 2015) were  
262 increased in fibrotic lung tissues we were intrigued by the observation that levels of  
263 VLDLR and SDC2 were also markedly elevated in the lung after silica exposure.  
264 Even after an exhaustive search, we were unable to find any reports linking either  
265 VLDLR or SDC2 to silicosis in any tissues. Based on this, we speculated whether  
266 changes in the expression of VLDLR or SDC2 can influence fibrotic responses to  
267 TGF $\beta$ 1 in lung fibroblasts. To test this, we next performed siRNA knockdown of  
268 VLDLR or SDC2 in MRC-5 cells using several different siRNA probes. Because the  
269 quantity of gene knockdown varied with different siRNAs we utilized only siRNAs  
270 demonstrating the most effective knockdown in our studies; this was siRNA 2 and 3  
271 for VLDLR, and siRNA 3 for SDC2 (Figure 4). As shown in Figure 4, we found that  
272 knockdown of VLDLR markedly reduced COL I and  $\alpha$ -SMA expression in TGF $\beta$ 1  
273 treated MRC-5 fibroblasts. Moreover, we also found that knockdown of SDC2  
274 significantly suppressed COLI expression, although non-significant decreases in  
275  $\alpha$ -SMA levels were seen in TGF $\beta$ 1 treated cells.

## DISCUSSION

Biomarker discovery can be accomplished using a variety of proteomic approaches and biological specimens, including urine, serum or lysates from whole organ digests. However, for research in solid organs, such as the heart, brain, kidney or lung, it is often difficult to obtain sufficient quantities of patient samples for proteomic work. Moreover, tissue lysates, are composed of a conglomeration of different cell types, such as epithelial cells, smooth muscle cells, fibroblasts, immune cells and endothelialium, making it difficult to uncover novel biological mechanisms in individual cell types. Thus, *in vitro* models of individual cell populations are often employed to identify novel candidate biomarkers of functional processes *in vivo* (Paul *et al.*, 2013).

In this study, we performed iTRAQ-coupled LC-MS/MS analysis on rat lung fibroblasts treated with or without TGF- $\beta$ 1 to identify novel markers of activated myofibroblasts in the silica-exposed lung. From these studies, we identified many proteins differentially expressed and 196 proteins expressed at  $\geq 1.2$  fold relative to control. Importantly, many of these proteins were novel markers and had not previously been linked to TGF- $\beta$ 1 signalling in the lung, including several whose functional classes have been intimately tied to myofibroblast activation such as integrin and angiogenesis pathways as well as those less clearly associated with myofibroblast biology such as nucleic acid binding, hydrolase activity and transferase activity.

An important finding in this study was the observation that some of the proteins we identified in our proteomics analyses were also differentially expressed in the lung after silica exposure. For example, we found that levels of COL XI and COL V were markedly increased in the silicotic lung, although these findings were not surprising given the fact that collagen production is a well-recognized by product of TGF- $\beta$ 1 signalling (Raglow *et al.*, 2015). However, we also found that VCAM were significantly increased in the lung after silica exposure. The former findings is also

not unexpected given that transcript and protein levels of VCAM are reported to be increased in fibroblastic foci of IPF lungs (Agassandian, et al., 2015).

Two other proteins found to be differentially expressed in our proteomic analyses were VLDLR and SDC2. We were intrigued by these observations because our review of the literature had not previously associated these proteins with silicosis. Western blot analysis and IHC confirmed that both proteins were increased in whole lung tissues and isolated fibroblasts from the lungs of silica-exposed rats. Interestingly, VLDLR expression is known to be increased in the fibrotic caps of atherosclerotic lesions in systemic blood vessels, suggesting it may be involved in more than just lipid trafficking (Eck *et al.*, 2005). In IPF patient lung tissues, SDC2 was found to be over-expressed in two reports (Chen *et al.*, 2004; Ruiz *et al.*, 2012). More importantly, we found that knocking down the expression of either VLDLR or SDC2 effectively reduced collagen production, supporting the notion that these proteins play a role in the pathobiology of pulmonary fibrosis.

In conclusion, iTRAQ coupled LC-MS/MS of TGF- $\beta$ 1-induced fibroblasts can be utilized to identify novel markers of silica-induced lung fibrosis. Future mechanistic studies will be needed to uncover whether individual proteins are simply a marker of disease or play a biological role in the onset or progression of pulmonary fibrosis.

### **Ethics approval**

All animal experiments were reviewed and approved by the Institutional Animal Care and Use Committee at the North China University of Science and Technology University prior to the initiation of any studies.

### **Consent for publication**

Not applicable.

### **Competing interests**

The authors declare that they have no competing interests.

### **Funding**

This work was supported by the National Natural Science Foundation of China (No. 81472953); the Natural Science Foundation of Hebei Province (No. H20162091705); and Outstanding Young Foundation of North China University of Science and Technology (JP201513).

### **Authors' contributions**

FY and HX designed the study. MN, JF, ZH, XD, YY, MN, GX, and GY carried out the experimental work, analyzed the data, and drafted the manuscript. RS participated in the design of the study and critically reviewed the manuscript and provided intellectual input. RS and RM helped write and critically reviewed the manuscript and provided intellectual input. WZ, ZB, LS, LS and WJ conceived the study, and participated in coordination, and helped in drafting the manuscript. All authors read and approved the final manuscript.

### **Acknowledgements**

Not applicable.

## REFERENCES

- Agassandian, M., Tedrow, J. R., Sembrat, J., Kass, D. J., Zhang, Y., Goncharova, E. A., Kaminski, N., Mallampalli, R. K., and Vuga, L. J. (2015). VCAM-1 is a TGF-beta1 inducible gene upregulated in idiopathic pulmonary fibrosis. *Cellular signalling* **27**(12), 2467-73.
- Chen, L., Klass, C., and Woods, A. (2004). Syndecan-2 regulates transforming growth factor-beta signaling. *The Journal of biological chemistry* **279**(16), 15715-8.
- Eck, M. V., Oost, J., Goudriaan, J. R., Hoekstra, M., Hildebrand, R. B., Bos, I. S., van Dijk, K. W., and Van Berkel, T. J. (2005). Role of the macrophage very-low-density lipoprotein receptor in atherosclerotic lesion development. *Atherosclerosis* **183**(2), 230-7.
- Gauldie, J., Sime, P. J., Xing, Z., Marr, B., and Tremblay, G. M. (1999). Transforming growth factor-beta gene transfer to the lung induces myofibroblast presence and pulmonary fibrosis. *Current topics in pathology. Ergebnisse der Pathologie* **93**, 35-45.
- Harris, W. T., Kelly, D. R., Zhou, Y., Wang, D., MacEwen, M., Hagood, J. S., Clancy, J. P., Ambalavanan, N., and Sorscher, E. J. (2013). Myofibroblast differentiation and enhanced TGF-B signaling in cystic fibrosis lung disease. *PloS one* **8**(8), e70196.
- Jagirdar, J., Begin, R., Dufresne, A., Goswami, S., Lee, T. C., and Rom, W. N. (1996). Transforming growth factor-beta (TGF-beta) in silicosis. *American journal of respiratory and critical care medicine* **154**(4 Pt 1), 1076-81.
- Liu, Y., Xu, H., Geng, Y., Xu, D., Zhang, L., Yang, Y., Wei, Z., Zhang, B., Li, S., Gao, X., *et al.* (2017). Dibutyl-cAMP attenuates pulmonary fibrosis by blocking myofibroblast differentiation via PKA/CREB/CBP signaling in rats with silicosis. *Respiratory research* **18**(1), 38.
- Mi, H., Muruganujan, A., Casagrande, J. T., and Thomas, P. D. (2013). Large-scale gene function analysis with the PANTHER classification system. *Nature protocols* **8**(8), 1551-66.
- Nesvizhskii, A. I., Keller, A., Kolker, E., and Aebersold, R. (2003). A statistical model for identifying proteins by tandem mass spectrometry. *Analytical chemistry* **75**(17), 4646-58.
- Paul, D., Kumar, A., Gajbhiye, A., Santra, M. K., and Srikanth, R. (2013). Mass spectrometry-based proteomics in molecular diagnostics: discovery of cancer biomarkers using tissue culture. *BioMed research international* **2013**, 783131.
- Raglow, Z., and Thomas, S. M. (2015). Tumor matrix protein collagen XIalpha1 in cancer. *Cancer*

*letters* **357**(2), 448-53.

Rauniyar, N., and Yates, J. R., 3rd (2014). Isobaric labeling-based relative quantification in shotgun proteomics. *Journal of proteome research* **13**(12), 5293-309.

Ruiz, X. D., Mlakar, L. R., Yamaguchi, Y., Su, Y., Larregina, A. T., Pilewski, J. M., and Feghali-Bostwick, C. A. (2012). Syndecan-2 is a novel target of insulin-like growth factor binding protein-3 and is over-expressed in fibrosis. *PloS one* **7**(8), e43049.

Seluanov, A., Vaidya, A., and Gorbunova, V. (2010). Establishing primary adult fibroblast cultures from rodents. *Journal of visualized experiments : JoVE* doi: 10.3791/2033(44).

Wisniewski, J. R., Zougman, A., Nagaraj, N., and Mann, M. (2009). Universal sample preparation method for proteome analysis. *Nature methods* **6**(5), 359-62.

Xiaojun, W., Yan, L., Hong, X., Xianghong, Z., Shifeng, L., Dingjie, X., Xuemin, G., Lijuan, Z., Bonan, Z., Zhongqiu, W., *et al.* (2016). Acetylated alpha-Tubulin Regulated by N-Acetyl-Seryl-Aspartyl-Lysyl-Proline(Ac-SDKP) Exerts the Anti-fibrotic Effect in Rat Lung Fibrosis Induced by Silica. *Scientific reports* **6**, 32257.

Xu, H., Yang, F., Sun, Y., Yuan, Y., Cheng, H., Wei, Z., Li, S., Cheng, T., Brann, D., and Wang, R. (2012). A new antifibrotic target of Ac-SDKP: inhibition of myofibroblast differentiation in rat lung with silicosis. *PloS one* **7**(7), e40301.



**Table 1. Subset of differentially expressed proteins in cultured TGF- $\beta$ -induced myofibroblasts relative to the untreated control**

| <b>No.</b> | <b>Protein name</b>                            | <b>Accession Number</b> | <b>Molecular Weight</b> | <b>Fold change</b> |
|------------|------------------------------------------------|-------------------------|-------------------------|--------------------|
| 1          | Collagen alpha-1(II) chain                     | CO2A1_RAT               | 135 kDa                 | 1.60               |
| 2          | Cluster of Histone H2A type 1                  | H2A1_RAT [4]            | 14 kDa                  | 1.70               |
| 3          | Collagen alpha-1(V) chain                      | CO5A1_RAT               | 184 kDa                 | 1.50               |
| 4          | Protein S100-A11                               | S10AB_RAT               | 11 kDa                  | 1.59               |
| 5          | Vascular cell adhesion protein 1               | VCAM1_RAT               | 81 kDa                  | 1.55               |
| 6          | Collagen alpha-1(XI) chain                     | COBA1_RAT               | 181 kDa                 | 1.70               |
| 7          | Cluster of Thymosin beta-4                     | TYB4_RAT                | 5 kDa                   | 2.50               |
| 8          | Cluster of Haemoglobin subunit beta-1          | HBB1_RAT [2]            | 16 kDa                  | 2.25               |
| 9          | Haemoglobin subunit alpha-1/2                  | HBA_RAT                 | 15 kDa                  | 1.90               |
| 10         | Oxidised low-density lipoprotein receptor 1    | OLR1_RAT                | 42 kDa                  | 1.55               |
| 11         | Transmembrane protein 214                      | TM214_RAT               | 77 kDa                  | 1.50               |
| 12         | Very low-density lipoprotein receptor          | VLDLR_RAT               | 97 kDa                  | 1.55               |
| 13         | Syndecan-2                                     | SDC2_RAT                | 22 kDa                  | 1.90               |
| 14         | Serum albumin                                  | ALBU_RAT                | 69 kDa                  | 0.59               |
| 15         | Histone H4                                     | H4_RAT                  | 11 kDa                  | 0.25               |
| 16         | Corticosteroid 11-beta-dehydrogenase isozyme 1 | DH11_RAT                | 32 kDa                  | 0.65               |
| 17         | Collectin-12                                   | COL12_RAT               | 82 kDa                  | 0.60               |
| 18         | Cluster of Neurotrimin                         | NTRI_RAT [2]            | 38 kDa                  | 0.65               |
| 19         | Programmed cell death protein 4                | PDCD4_RAT               | 52 kDa                  | 0.55               |
| 20         | Plasminogen receptor (KT)                      | PLRKT_RAT               | 17 kDa                  | 0.60               |

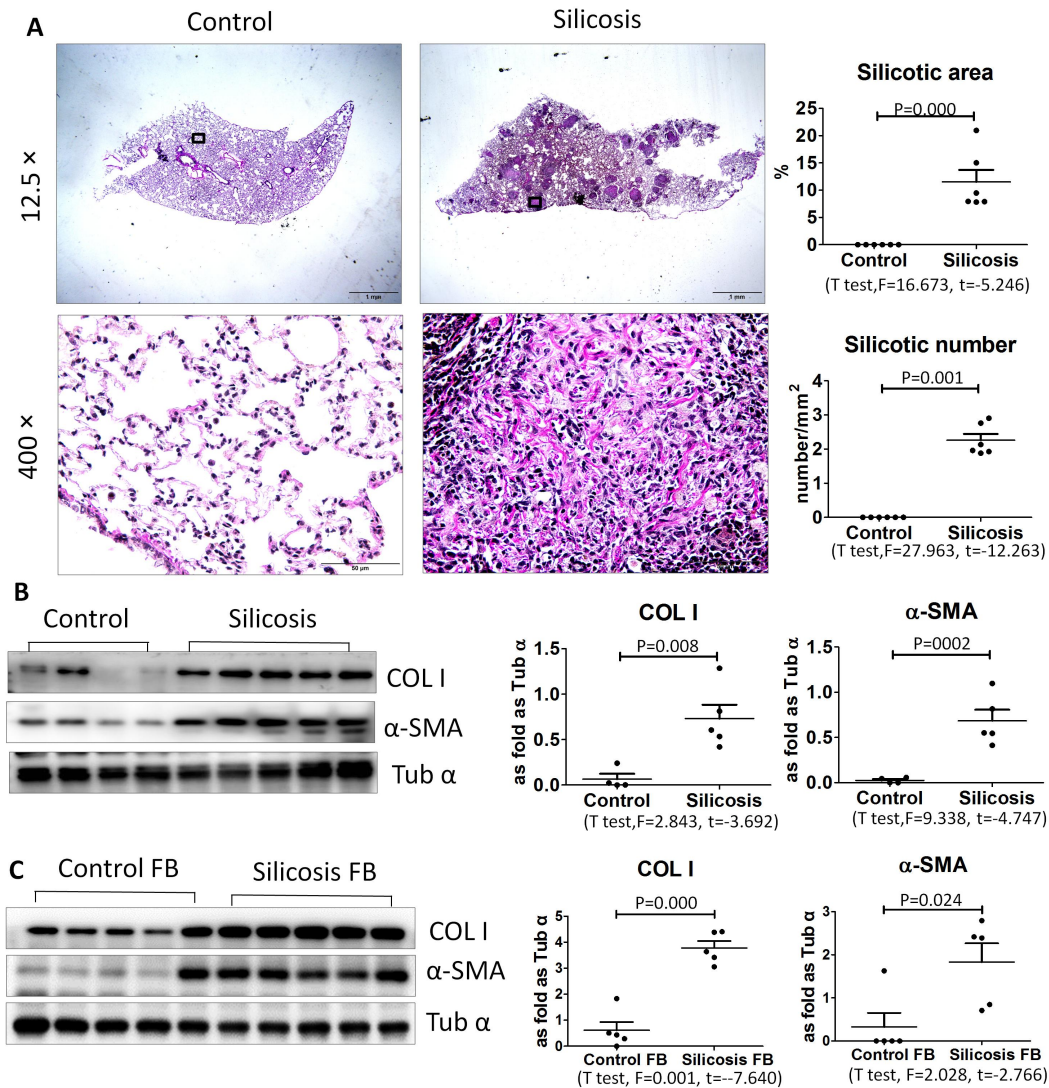

**Figure 1**

**Figure 1. Histological examination of control and silica-exposed rat lung.** A. Low (top) and high (bottom) power images of control and silica-exposed lung after van Gieson (VG) staining. Right) Quantitative assessment of area and number silicotic nodules in the lungs of control and silica-exposed rats. Western blot analysis for collagen I (COLI) and  $\alpha$ -smooth muscle actin ( $\alpha$ -SMA) in whole lung tissues and isolated fibroblasts from control and silica-exposed rats. Abbreviations: C, control; S, silicosis. Statistical significance was assessed using the Student's t-test.

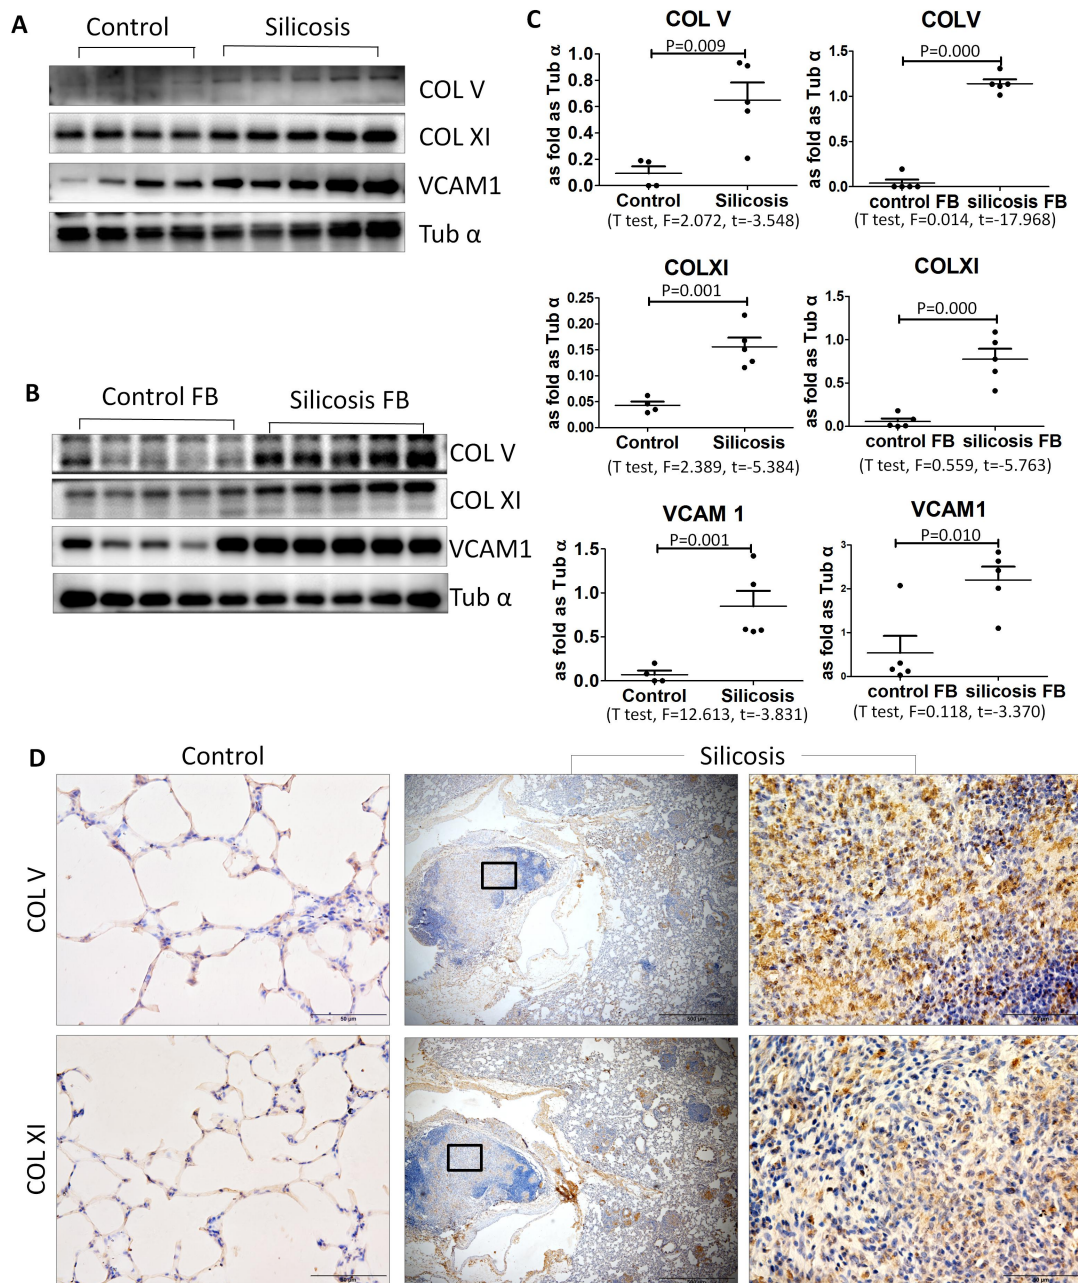

**Figure 2**

**Figure 2. COL V, COL XI and VCAM1 levels are increased in the rat lung after silica exposure.** A-C) Western blot analysis for COL V, COL XI and VCAM1 in control and silica exposed rat lung tissues. Quantitative analyses of immunoblots are shown in (C). D) IHC for expression COL V and COL XI in lung tissues from control (left) and silica-exposed rats. Statistical significance was assessed using the Student's t-test.



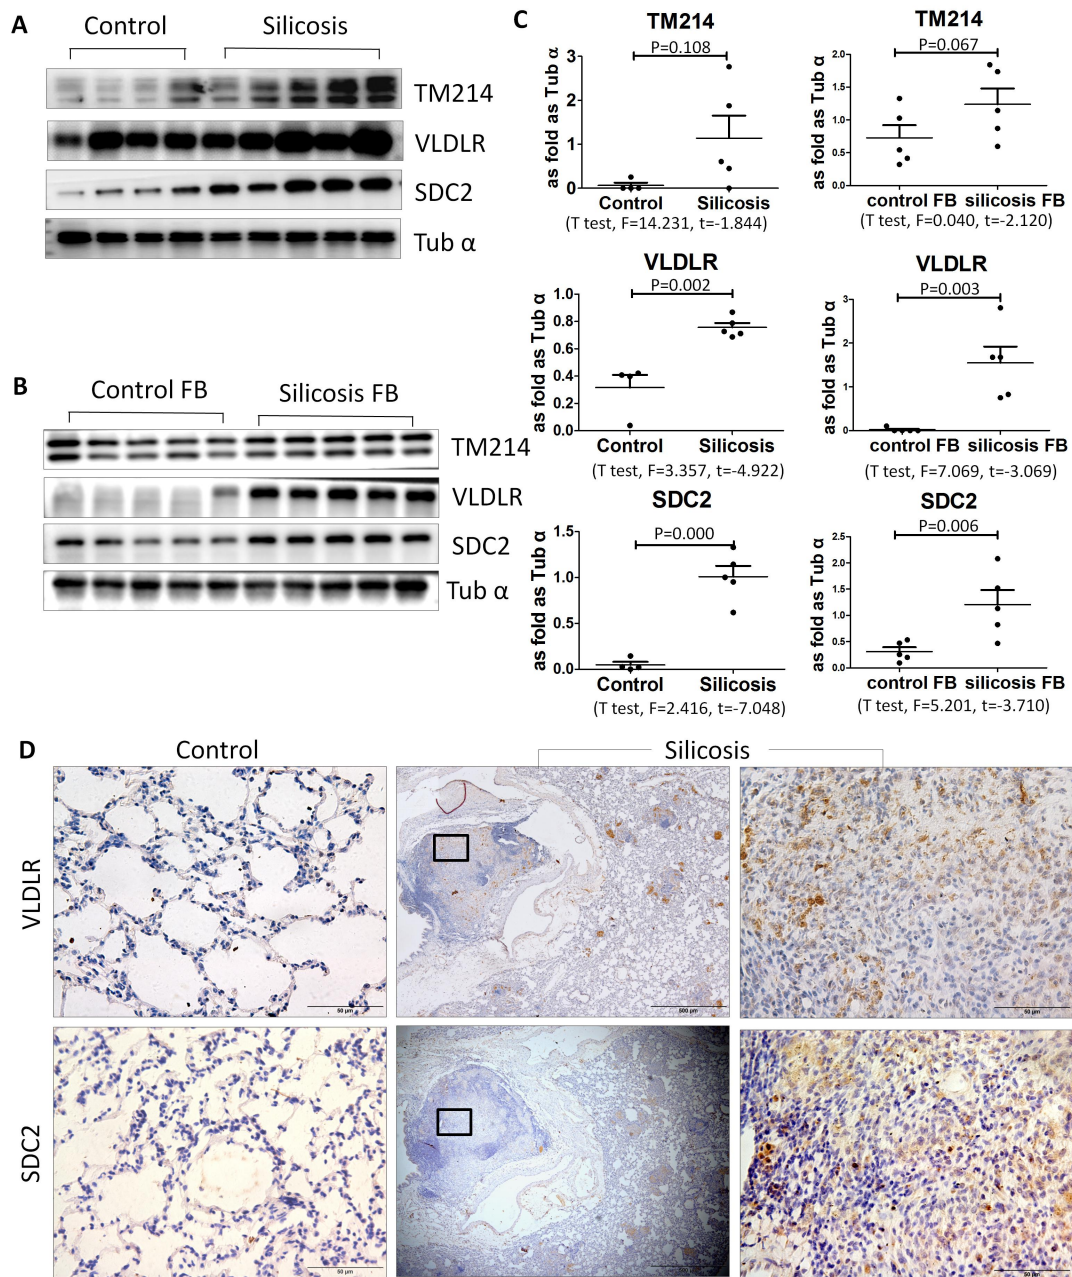

**Figure 3**

**Figure 3. TM214, VLDLR and SDC2 expression is increased in the rat lung after silica exposure.** A-C) Western blot analysis for TM214, VLDLR and SDC2 in control and silica exposed rat lung tissues. Quantitative analyses of immunoblots are shown in (C). D) IHC for expression VLDLR and SDC2 in lung tissues from control (left) and silica-exposed rats. Statistical significance was assessed using the Student's t-test.

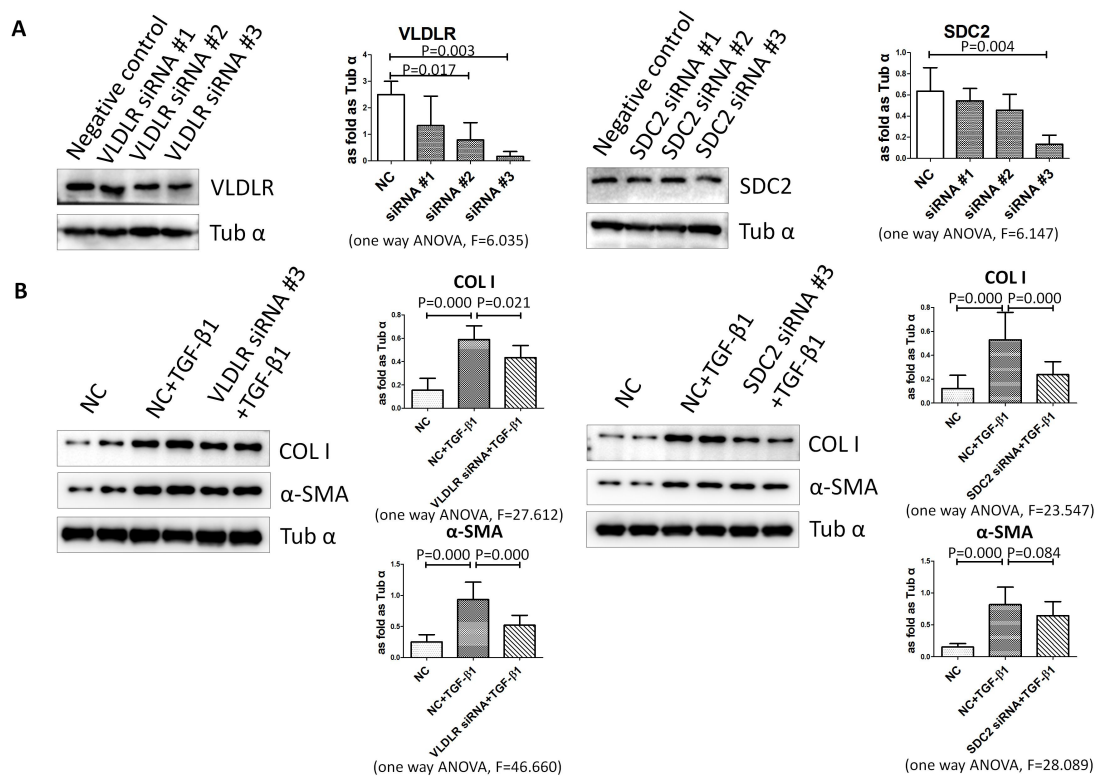

Figure 4

**Figure 4. siRNA knockdown of VLDLR or SDC2 in lung fibroblasts reduces TGF-β1-induced collagen.** A) Effectiveness of different siRNA probes in knockdown expression of VLDLR or SDC2. B) siRNA knockdown of VLDLR reduces expression of COL I and α-SMA in TGF-β1 treated MRC-5 fibroblasts. siRNA knockdown of SDC2 reduces expression of COL1 and causes a non-significant reduction in α-SMA in TGF-β1 treated MRC-5 fibroblasts. Statistical significance was assessed using the one way ANOVA.

**Table S1 The down-regulation of differential proteins in fibroblasts induced by TGF- $\beta$ 1**

| No. | Protein Name                                                                                      | Accession Number | Molecular weight (Kda) | Fold |
|-----|---------------------------------------------------------------------------------------------------|------------------|------------------------|------|
| 1   | Histone H4 OS=Rattus norvegicus<br>GN=Hist1h4b PE=1 SV=2                                          | H4_RAT           | 11 kDa                 | 0.25 |
| 2   | Programmed cell death protein 4 OS=Rattus norvegicus<br>GN=Pcd4 PE=1 SV=2                         | PDCD4_RAT        | 52 kDa                 | 0.55 |
| 3   | Serum albumin OS=Rattus norvegicus<br>GN=Alb PE=1 SV=2                                            | ALBU_RAT         | 69 kDa                 | 0.59 |
| 4   | Collectin-12 OS=Rattus norvegicus<br>GN=Colec12 PE=2 SV=1                                         | COL12_RAT        | 82 kDa                 | 0.60 |
| 5   | Plasminogen receptor (KT) OS=Rattus norvegicus<br>GN=Plgrkt PE=1 SV=1                             | PLRKT_RAT        | 17 kDa                 | 0.60 |
| 6   | Corticosteroid 11-beta-dehydrogenase isozyme 1 OS=Rattus norvegicus<br>GN=Hsd11b1 PE=1 SV=2       | DHI1_RAT         | 32 kDa                 | 0.65 |
| 7   | Cluster of Neurotrimin OS=Rattus norvegicus<br>GN=Ntm PE=1 SV=1<br>(NTRI RAT)                     | NTRI_RAT [2]     | 38 kDa                 | 0.65 |
| 8   | Apolipoprotein E OS=Rattus norvegicus<br>GN=ApoE PE=1 SV=2                                        | APOE_RAT         | 36 kDa                 | 0.70 |
| 9   | Galectin-3-binding protein OS=Rattus norvegicus<br>GN=Lgals3bp PE=1 SV=2                          | LG3BP_RAT        | 64 kDa                 | 0.70 |
| 10  | Mitochondrial 2-oxoglutarate/malate carrier protein OS=Rattus norvegicus<br>GN=Slc25a11 PE=2 SV=3 | M2OM_RAT         | 34 kDa                 | 0.70 |
| 11  | ER membrane protein complex subunit 10 OS=Rattus norvegicus<br>GN=Emc10 PE=1 SV=1                 | EMC10_RAT        | 27 kDa                 | 0.70 |
| 12  | Gap junction alpha-1 protein OS=Rattus norvegicus<br>GN=Gja1 PE=1 SV=2                            | CXA1_RAT         | 43 kDa                 | 0.70 |
| 13  | Dystrobrevin beta OS=Rattus norvegicus<br>GN=Dtnb PE=2 SV=2                                       | DTNB_RAT         | 74 kDa                 | 0.70 |
| 14  | Maspardin OS=Rattus norvegicus<br>GN=Spg21 PE=2 SV=1                                              | SPG21_RAT        | 30 kDa                 | 0.70 |
| 15  | Structural maintenance of chromosomes protein 1A OS=Rattus norvegicus<br>GN=Smc1a PE=1 SV=1       | SMC1A_RAT        | 143 kDa                | 0.75 |
| 16  | Phosphate carrier protein, mitochondrial OS=Rattus norvegicus<br>GN=Slc25a3 PE=1 SV=1             | MPCP_RAT         | 39 kDa                 | 0.75 |
| 17  | Sorting and assembly machinery component 50 homolog OS=Rattus norvegicus<br>GN=Samm50 PE=1 SV=1   | SAM50_RAT        | 52 kDa                 | 0.75 |
| 18  | ATP-binding cassette sub-family D member 3 OS=Rattus norvegicus<br>GN=Abcd3 PE=1 SV=3             | ABCD3_RAT        | 75 kDa                 | 0.75 |
| 19  | Anthrax toxin receptor 1 OS=Rattus norvegicus<br>GN=Antxr1 PE=2 SV=2                              | ANTR1_RAT        | 62 kDa                 | 0.75 |
| 20  | Coiled-coil and C2 domain-containing protein 1A OS=Rattus norvegicus<br>GN=Cc2d1a PE=2 SV=2       | C2D1A_RAT        | 104 kDa                | 0.75 |
| 21  | Proteasome activator complex subunit 2 OS=Rattus norvegicus<br>GN=Psm2 PE=2 SV=3                  | PSME2_RAT        | 27 kDa                 | 0.75 |

|    |                                                                                                                 |           |         |      |
|----|-----------------------------------------------------------------------------------------------------------------|-----------|---------|------|
| 22 | Transmembrane emp24 domain-containing protein 2 OS=Rattus norvegicus GN=Tmed2 PE=1 SV=1                         | TMED2_RAT | 23 kDa  | 0.75 |
| 23 | Keratin, type II cytoskeletal 4 OS=Rattus norvegicus GN=Krt4 PE=3 SV=1                                          | K2C4_RAT  | 58 kDa  | 0.75 |
| 24 | ATP synthase subunit d, mitochondrial OS=Rattus norvegicus GN=Atp5h PE=1 SV=3                                   | ATP5H_RAT | 19 kDa  | 0.75 |
| 25 | Voltage-dependent anion-selective channel protein 3 OS=Rattus norvegicus GN=Vdac3 PE=1 SV=2                     | VDAC3_RAT | 31 kDa  | 0.75 |
| 26 | Ras GTPase-activating protein 1 OS=Rattus norvegicus GN=Rasa1 PE=3 SV=1                                         | RASA1_RAT | 115 kDa | 0.75 |
| 27 | Gamma-adducin OS=Rattus norvegicus GN=Add3 PE=1 SV=2                                                            | ADDG_RAT  | 79 kDa  | 0.75 |
| 28 | Slit homolog 2 protein (Fragment) OS=Rattus norvegicus GN=Slit2 PE=1 SV=3                                       | SLIT2_RAT | 86 kDa  | 0.75 |
| 29 | Sequestosome-1 OS=Rattus norvegicus GN=Sqstm1 PE=1 SV=1                                                         | SQSTM_RAT | 48 kDa  | 0.75 |
| 30 | Cluster of Hydroxymethylglutaryl-CoA lyase, mitochondrial OS=Rattus norvegicus GN=Hmgcl PE=2 SV=1 (HMGCL_RAT)   | HMGCL_RAT | 34 kDa  | 0.75 |
| 31 | Lipid phosphate phosphohydrolase 3 OS=Rattus norvegicus GN=Ppap2b PE=1 SV=1                                     | LPP3_RAT  | 35 kDa  | 0.75 |
| 32 | 39S ribosomal protein L37, mitochondrial OS=Rattus norvegicus GN=Mrpl37 PE=2 SV=1                               | RM37_RAT  | 48 kDa  | 0.75 |
| 33 | Lipid phosphate phosphohydrolase 1 OS=Rattus norvegicus GN=Ppap2a PE=1 SV=1                                     | LPP1_RAT  | 32 kDa  | 0.75 |
| 34 | Ras-related protein Rab-13 OS=Rattus norvegicus GN=Rab13 PE=1 SV=2                                              | RAB13_RAT | 23 kDa  | 0.75 |
| 35 | Phospholipid scramblase 3 OS=Rattus norvegicus GN=Plscr3 PE=2 SV=1                                              | PLS3_RAT  | 32 kDa  | 0.77 |
| 36 | Spectrin beta chain, non-erythrocytic 2 OS=Rattus norvegicus GN=Sptbn2 PE=1 SV=2                                | SPTN2_RAT | 271 kDa | 0.80 |
| 37 | Hexokinase-1 OS=Rattus norvegicus GN=Hk1 PE=1 SV=4                                                              | HXK1_RAT  | 102 kDa | 0.80 |
| 38 | Unconventional myosin-Ib OS=Rattus norvegicus GN=Myo1b PE=1 SV=1                                                | MYO1B_RAT | 132 kDa | 0.80 |
| 39 | Dolichyl-diphosphooligosaccharide--protein glycosyltransferase subunit 2 OS=Rattus norvegicus GN=Rpn2 PE=2 SV=2 | RPN2_RAT  | 69 kDa  | 0.80 |
| 40 | Matrix Gla protein OS=Rattus norvegicus GN=Mgp PE=1 SV=2                                                        | MGP_RAT   | 12 kDa  | 0.80 |
| 41 | Catalase OS=Rattus norvegicus GN=Cat PE=1 SV=3                                                                  | CATA_RAT  | 60 kDa  | 0.80 |
| 42 | Cluster of Caveolin-1 OS=Rattus norvegicus GN=Cav1 PE=1 SV=3 (CAV1_RAT)                                         | CAV1_RAT  | 21 kDa  | 0.80 |
| 43 | Myeloid-associated differentiation marker OS=Rattus norvegicus GN=Myadm PE=2 SV=1                               | MYADM_RAT | 35 kDa  | 0.80 |
| 44 | Slit homolog 3 protein OS=Rattus                                                                                | SLIT3_RAT | 168 kDa | 0.80 |

|    |                                                                                                                    |           |         |      |
|----|--------------------------------------------------------------------------------------------------------------------|-----------|---------|------|
|    | norvegicus GN=Slit3 PE=2 SV=1                                                                                      |           |         |      |
| 45 | Voltage-dependent anion-selective channel protein 2 OS=Rattus norvegicus GN=Vdac2 PE=1 SV=2                        | VDAC2_RAT | 32 kDa  | 0.80 |
| 46 | Aldehyde dehydrogenase, dimeric NADP-preferring OS=Rattus norvegicus GN=Aldh3a1 PE=1 SV=3                          | AL3A1_RAT | 50 kDa  | 0.80 |
| 47 | Kinesin-like protein KIF1B OS=Rattus norvegicus GN=Kif1b PE=1 SV=2                                                 | KIF1B_RAT | 204 kDa | 0.80 |
| 48 | AP2-associated protein kinase 1 OS=Rattus norvegicus GN=Aak1 PE=1 SV=1                                             | AAK1_RAT  | 104 kDa | 0.80 |
| 49 | Serine/threonine-protein kinase MRCK alpha OS=Rattus norvegicus GN=Cdc42bpa PE=1 SV=1                              | MRCKA_RAT | 197 kDa | 0.80 |
| 50 | Plexin-A3 OS=Rattus norvegicus GN=Plxna3 PE=3 SV=1                                                                 | PLXA3_RAT | 208 kDa | 0.80 |
| 51 | Keratin, type II cytoskeletal 1 OS=Rattus norvegicus GN=Krt1 PE=2 SV=1                                             | K2C1_RAT  | 65 kDa  | 0.80 |
| 52 | Calcium-binding and coiled-coil domain-containing protein 1 OS=Rattus norvegicus GN=Calcoco1 PE=2 SV=1             | CACO1_RAT | 77 kDa  | 0.80 |
| 53 | Nucleolar transcription factor 1 OS=Rattus norvegicus GN=Ubt1 PE=1 SV=1                                            | UBF1_RAT  | 89 kDa  | 0.80 |
| 54 | 2',3'-cyclic-nucleotide 3'-phosphodiesterase OS=Rattus norvegicus GN=Cnp PE=1 SV=2                                 | CN37_RAT  | 47 kDa  | 0.80 |
| 55 | 72 kDa type IV collagenase OS=Rattus norvegicus GN=Mmp2 PE=2 SV=2                                                  | MMP2_RAT  | 74 kDa  | 0.80 |
| 56 | Sideroflexin-3 OS=Rattus norvegicus GN=Sfxn3 PE=2 SV=1                                                             | SFXN3_RAT | 35 kDa  | 0.80 |
| 57 | Core histone macro-H2A.1 OS=Rattus norvegicus GN=H2afy PE=1 SV=4                                                   | H2AY_RAT  | 40 kDa  | 0.80 |
| 58 | 5'-nucleotidase domain-containing protein 2 OS=Rattus norvegicus GN=Nt5dc2 PE=2 SV=2                               | NT5D2_RAT | 64 kDa  | 0.80 |
| 59 | Contactin-2 OS=Rattus norvegicus GN=Cntn2 PE=1 SV=1                                                                | CNTN2_RAT | 113 kDa | 0.80 |
| 60 | Casein kinase II subunit alpha OS=Rattus norvegicus GN=Csnk2a1 PE=1 SV=2                                           | CSK21_RAT | 45 kDa  | 0.80 |
| 61 | Phospholipid hydroperoxide glutathione peroxidase, nuclear OS=Rattus norvegicus GN=Gpx4 PE=2 SV=3                  | GPX42_RAT | 29 kDa  | 0.80 |
| 62 | Disintegrin and metalloproteinase domain-containing protein 10 (Fragment) OS=Rattus norvegicus GN=Adam10 PE=2 SV=1 | ADA10_RAT | 60 kDa  | 0.80 |
| 63 | Alpha-adducin OS=Rattus norvegicus GN=Add1 PE=2 SV=2                                                               | ADDA_RAT  | 80 kDa  | 0.80 |
| 64 | Mitochondrial carnitine/acylcarnitine carrier protein OS=Rattus norvegicus GN=Slc25a20 PE=1 SV=1                   | MCAT_RAT  | 33 kDa  | 0.80 |
| 65 | Basic leucine zipper and W2 domain-containing protein 2 OS=Rattus norvegicus GN=Bzw2 PE=2 SV=1                     | BZW2_RAT  | 48 kDa  | 0.80 |
| 66 | Protein Wnt-5a OS=Rattus norvegicus GN=Wnt5a PE=2 SV=2                                                             | WNT5A_RAT | 42 kDa  | 0.80 |
| 67 | Phosphatidylinositol 3-kinase regulatory                                                                           | P85A_RAT  | 84 kDa  | 0.80 |



|    |                                                                                                  |           |        |      |
|----|--------------------------------------------------------------------------------------------------|-----------|--------|------|
|    | subunit alpha OS=Rattus norvegicus<br>GN=Pik3r1 PE=1 SV=1                                        |           |        |      |
| 68 | Microtubule-associated protein RP/EB family member 2 OS=Rattus norvegicus<br>GN=Mapre2 PE=2 SV=1 | MARE2_RAT | 37 kDa | 0.80 |
| 69 | ADP-ribosyl cyclase/cyclic ADP-ribose hydrolase 2 OS=Rattus norvegicus<br>GN=Bst1 PE=2 SV=1      | BST1_RAT  | 35 kDa | 0.80 |
| 70 | Insulin-like growth factor-binding protein 5 OS=Rattus norvegicus<br>GN=Igfbp5 PE=1 SV=1         | IBP5_RAT  | 30 kDa | 0.80 |
| 71 | Trophoblast glycoprotein OS=Rattus norvegicus<br>GN=Tpbg PE=2 SV=1                               | TPBG_RAT  | 47 kDa | 0.80 |
| 72 | Tubulin-specific chaperone E OS=Rattus norvegicus<br>GN=Tbce PE=2 SV=1                           | TBCE_RAT  | 59 kDa | 0.80 |
| 73 | 3-mercaptopyruvate sulfurtransferase OS=Rattus norvegicus<br>GN=Mpst PE=1 SV=3                   | THTM_RAT  | 33 kDa | 0.80 |
| 74 | DnaJ homolog subfamily B member 6 OS=Rattus norvegicus<br>GN=Dnajb6 PE=1 SV=1                    | DNJB6_RAT | 39 kDa | 0.80 |
| 75 | Hydroxyacylglutathione hydrolase, mitochondrial OS=Rattus norvegicus<br>GN=Hagh PE=1 SV=2        | GLO2_RAT  | 34 kDa | 0.80 |
| 76 | Cathepsin L1 OS=Rattus norvegicus<br>GN=Ctsl PE=1 SV=2                                           | CATL1_RAT | 38 kDa | 0.80 |
| 77 | Magnesium transporter protein 1 OS=Rattus norvegicus<br>GN=Magt1 PE=2 SV=2                       | MAGT1_RAT | 38 kDa | 0.80 |
| 78 | Collagen triple helix repeat-containing protein 1 OS=Rattus norvegicus<br>GN=Cthrc1 PE=1 SV=1    | CTHR1_RAT | 26 kDa | 0.80 |
| 79 | Methylosome protein 50 OS=Rattus norvegicus<br>GN=Wdr77 PE=1 SV=1                                | MEP50_RAT | 37 kDa | 0.80 |
| 80 | Transmembrane 7 superfamily member 3 OS=Rattus norvegicus<br>GN=Tm7sf3 PE=2 SV=1                 | TM7S3_RAT | 64 kDa | 0.80 |
| 81 | Cytochrome c oxidase subunit 7C, mitochondrial OS=Rattus norvegicus<br>GN=Cox7c PE=1 SV=2        | COX7C_RAT | 7 kDa  | 0.80 |

**Table S2 The up-regulation of differential proteins in fibroblasts induced by TGF- $\beta$ 1**

| No. | Protein Name                                                                          | Accession Number | Molecular weight (Kda) | Fold |
|-----|---------------------------------------------------------------------------------------|------------------|------------------------|------|
| 1   | Cluster of Thymosin beta-4 OS=Rattus norvegicus GN=Tmsb4x PE=2 SV=2 (TYB4_RAT)        | TYB4_RAT         | 5 kDa                  | 2.50 |
| 2   | Cluster of Hemoglobin subunit beta-1 OS=Rattus norvegicus GN=Hbb PE=1 SV=3 (HBB1_RAT) | HBB1_RAT [2]     | 16 kDa                 | 2.25 |
| 3   | Hemoglobin subunit alpha-1/2 OS=Rattus norvegicus GN=Hba1 PE=1 SV=3                   | HBA_RAT          | 15 kDa                 | 1.90 |
| 4   | Syndecan-2 OS=Rattus norvegicus GN=Sdc2 PE=2 SV=2                                     | SDC2_RAT         | 22 kDa                 | 1.90 |
| 5   | Cluster of Histone H2A type 1 OS=Rattus norvegicus PE=1 SV=2 (H2A1_RAT)               | H2A1_RAT [4]     | 14 kDa                 | 1.70 |
| 6   | Collagen alpha-1(XI) chain OS=Rattus norvegicus GN=Col11a1 PE=1 SV=2                  | COBA1_RAT        | 181 kDa                | 1.70 |
| 7   | Collagen alpha-1(II) chain OS=Rattus norvegicus GN=Col2a1 PE=1 SV=2                   | CO2A1_RAT        | 135 kDa                | 1.60 |
| 8   | Protein S100-A11 OS=Rattus norvegicus GN=S100a11 PE=3 SV=1                            | S10AB_RAT        | 11 kDa                 | 1.59 |
| 9   | Vascular cell adhesion protein 1 OS=Rattus norvegicus GN=Vcam1 PE=2 SV=1              | VCAM1_RAT        | 81 kDa                 | 1.55 |
| 10  | Oxidized low-density lipoprotein receptor 1 OS=Rattus norvegicus GN=Olr1 PE=2 SV=1    | OLR1_RAT         | 42 kDa                 | 1.55 |
| 11  | Very low-density lipoprotein receptor OS=Rattus norvegicus GN=Vldlr PE=2 SV=1         | VLDLR_RAT        | 97 kDa                 | 1.55 |
| 12  | Collagen alpha-1(V) chain OS=Rattus norvegicus GN=Col5a1 PE=1 SV=1                    | CO5A1_RAT        | 184 kDa                | 1.50 |
| 13  | Transmembrane protein 214 OS=Rattus norvegicus GN=Tmem214 PE=2 SV=1                   | TM214_RAT        | 77 kDa                 | 1.50 |
| 14  | Protein-lysine 6-oxidase OS=Rattus norvegicus GN=Lox PE=1 SV=2                        | LYOX_RAT         | 47 kDa                 | 1.45 |
| 15  | ATPase inhibitor, mitochondrial OS=Rattus norvegicus GN=Atpif1 PE=3 SV=2              | ATIF1_RAT        | 12 kDa                 | 1.40 |
| 16  | Collagen alpha-1(III) chain OS=Rattus norvegicus GN=Col3a1 PE=2 SV=3                  | CO3A1_RAT        | 139 kDa                | 1.35 |
| 17  | Tropomyosin beta chain OS=Rattus norvegicus GN=Tpm2 PE=3 SV=1                         | TPM2_RAT         | 33 kDa                 | 1.35 |
| 18  | 60S ribosomal protein L26 OS=Rattus norvegicus GN=Rpl26 PE=1 SV=1                     | RL26_RAT         | 17 kDa                 | 1.35 |
| 19  | Protein PRRC1 OS=Rattus norvegicus GN=Prrc1 PE=2 SV=1                                 | PRRC1_RAT        | 46 kDa                 | 1.35 |

|    |                                                                                                            |           |         |      |
|----|------------------------------------------------------------------------------------------------------------|-----------|---------|------|
| 20 | S-adenosylmethionine synthase isoform type-2 OS=Rattus norvegicus GN=Mat2a PE=1 SV=1                       | METK2_RAT | 44 kDa  | 1.35 |
| 21 | Synaptobrevin homolog YKT6 OS=Rattus norvegicus GN=Ykt6 PE=1 SV=1                                          | YKT6_RAT  | 22 kDa  | 1.35 |
| 22 | 60S ribosomal protein L37a OS=Rattus norvegicus GN=Rpl37a PE=1 SV=1                                        | RL37A_RAT | 8 kDa   | 1.35 |
| 23 | Solute carrier family 2, facilitated glucose transporter member 1 OS=Rattus norvegicus GN=Slc2a1 PE=1 SV=1 | GTR1_RAT  | 54 kDa  | 1.35 |
| 24 | Pulmonary surfactant-associated protein A OS=Rattus norvegicus GN=Sftpa1 PE=1 SV=3                         | SFTPA_RAT | 26 kDa  | 1.35 |
| 25 | Small ubiquitin-related modifier 2 OS=Rattus norvegicus GN=Sumo2 PE=1 SV=1                                 | SUMO2_RAT | 11 kDa  | 1.35 |
| 26 | E3 ubiquitin-protein ligase RNF181 OS=Rattus norvegicus GN=Rnf181 PE=1 SV=1                                | RN181_RAT | 19 kDa  | 1.35 |
| 27 | Collagen alpha-1(I) chain OS=Rattus norvegicus GN=Col1a1 PE=1 SV=5                                         | CO1A1_RAT | 138 kDa | 1.30 |
| 28 | E3 ubiquitin-protein ligase PDZRN3 OS=Rattus norvegicus GN=Pdzrn3 PE=1 SV=1                                | PZRN3_RAT | 119 kDa | 1.30 |
| 29 | 60S ribosomal protein L23a OS=Rattus norvegicus GN=Rpl23a PE=2 SV=1                                        | RL23A_RAT | 18 kDa  | 1.30 |
| 30 | 40S ribosomal protein S19 OS=Rattus norvegicus GN=Rps19 PE=2 SV=3                                          | RS19_RAT  | 16 kDa  | 1.30 |
| 31 | Translation initiation factor eIF-2B subunit gamma OS=Rattus norvegicus GN=Eif2b3 PE=2 SV=2                | EI2BG_RAT | 50 kDa  | 1.30 |
| 32 | Protein phosphatase inhibitor 2 OS=Rattus norvegicus GN=Ppp1r2 PE=2 SV=2                                   | IPP2_RAT  | 23 kDa  | 1.30 |
| 33 | PHD finger-like domain-containing protein 5A OS=Rattus norvegicus GN=Phf5a PE=2 SV=1                       | PHF5A_RAT | 12 kDa  | 1.30 |
| 34 | Ras-related protein Rab-27A OS=Rattus norvegicus GN=Rab27a PE=1 SV=1                                       | RB27A_RAT | 25 kDa  | 1.30 |
| 35 | Fibroblast growth factor 2 OS=Rattus norvegicus GN=Fgf2 PE=2 SV=1                                          | FGF2_RAT  | 17 kDa  | 1.30 |
| 36 | Proteinase-activated receptor 1 OS=Rattus norvegicus GN=F2r PE=2 SV=1                                      | PAR1_RAT  | 48 kDa  | 1.30 |
| 37 | Collagen alpha-2(I) chain OS=Rattus norvegicus GN=Col1a2 PE=1 SV=3                                         | CO1A2_RAT | 130 kDa | 1.25 |
| 38 | Procollagen-lysine,2-oxoglutarate                                                                          | PLOD2_RAT | 85 kDa  | 1.25 |

|    |                                                                                                                         |           |         |      |
|----|-------------------------------------------------------------------------------------------------------------------------|-----------|---------|------|
|    | 5-dioxygenase 2 OS=Rattus norvegicus<br>GN=Plod2 PE=2 SV=1                                                              |           |         |      |
| 39 | 40S ribosomal protein S13 OS=Rattus norvegicus<br>GN=Rps13 PE=1 SV=2                                                    | RS13_RAT  | 17 kDa  | 1.25 |
| 40 | Plasminogen activator inhibitor 1 OS=Rattus norvegicus<br>GN=Serpine1 PE=2 SV=1                                         | PAI1_RAT  | 45 kDa  | 1.25 |
| 41 | Membrane-associated guanylate kinase, WW and PDZ domain-containing protein 3 OS=Rattus norvegicus<br>GN=Magi3 PE=1 SV=2 | MAGI3_RAT | 161 kDa | 1.25 |
| 42 | Plasminogen activator inhibitor 1 RNA-binding protein OS=Rattus norvegicus<br>GN=Serbp1 PE=1 SV=2                       | PAIRB_RAT | 45 kDa  | 1.25 |
| 43 | Translationally-controlled tumor protein OS=Rattus norvegicus<br>GN=Tpt1 PE=1 SV=1                                      | TCTP_RAT  | 19 kDa  | 1.25 |
| 44 | Nucleolar and coiled-body phosphoprotein 1 OS=Rattus norvegicus<br>GN=Nolc1 PE=1 SV=1                                   | NOLC1_RAT | 74 kDa  | 1.25 |
| 45 | 60S ribosomal protein L35a OS=Rattus norvegicus<br>GN=Rpl35a PE=3 SV=1                                                  | RL35A_RAT | 13 kDa  | 1.25 |
| 46 | Oligoribonuclease, mitochondrial OS=Rattus norvegicus<br>GN=Rexo2 PE=2 SV=1                                             | ORN_RAT   | 27 kDa  | 1.25 |
| 47 | Protein CYR61 OS=Rattus norvegicus<br>GN=Cyr61 PE=2 SV=1                                                                | CYR61_RAT | 42 kDa  | 1.25 |
| 48 | Protein TANC1 OS=Rattus norvegicus<br>GN=Tanc1 PE=1 SV=1                                                                | TANC1_RAT | 201 kDa | 1.25 |
| 49 | Guanine nucleotide-binding protein-like 3 OS=Rattus norvegicus<br>GN=Gnl3 PE=1 SV=1                                     | GNL3_RAT  | 61 kDa  | 1.25 |
| 50 | Glutamine--fructose-6-phosphate aminotransferase [isomerizing] 2 OS=Rattus norvegicus<br>GN=Gfpt2 PE=2 SV=3             | GFPT2_RAT | 77 kDa  | 1.25 |
| 51 | Osteopontin OS=Rattus norvegicus<br>GN=Spp1 PE=1 SV=2                                                                   | OSTP_RAT  | 35 kDa  | 1.25 |
| 52 | 60S ribosomal protein L36a OS=Rattus norvegicus<br>GN=Rpl36a PE=1 SV=2                                                  | RL36A_RAT | 12 kDa  | 1.25 |
| 53 | CDK5 regulatory subunit-associated protein 3 OS=Rattus norvegicus<br>GN=Cdk5rap3 PE=1 SV=1                              | CK5P3_RAT | 57 kDa  | 1.25 |
| 54 | 40S ribosomal protein S25 OS=Rattus norvegicus<br>GN=Rps25 PE=2 SV=1                                                    | RS25_RAT  | 14 kDa  | 1.25 |
| 55 | Growth factor receptor-bound protein 10 OS=Rattus norvegicus<br>GN=Grb10 PE=3 SV=1                                      | GRB10_RAT | 68 kDa  | 1.25 |
| 56 | ADP-ribosylation factor GTPase-activating                                                                               | ARFG1_RAT | 45 kDa  | 1.25 |

|    |                                                                                                                                     |           |        |      |
|----|-------------------------------------------------------------------------------------------------------------------------------------|-----------|--------|------|
|    | protein 1 OS=Rattus norvegicus GN=Arfgap1<br>PE=1 SV=1                                                                              |           |        |      |
| 57 | Squalene synthase OS=Rattus norvegicus<br>GN=Fdft1 PE=2 SV=1                                                                        | FDFT_RAT  | 48 kDa | 1.25 |
| 58 | Striatin-3 OS=Rattus norvegicus GN=Strn3<br>PE=2 SV=2                                                                               | STRN3_RAT | 87 kDa | 1.25 |
| 59 | Squalene monooxygenase OS=Rattus<br>norvegicus GN=Sqle PE=2 SV=1                                                                    | ERG1_RAT  | 64 kDa | 1.25 |
| 60 | Calcium-regulated heat stable protein 1<br>OS=Rattus norvegicus GN=Carhsp1 PE=1<br>SV=1                                             | CHSP1_RAT | 16 kDa | 1.25 |
| 61 | Rho guanine nucleotide exchange factor 6<br>OS=Rattus norvegicus GN=Arhgef6 PE=2<br>SV=1                                            | ARHG6_RAT | 87 kDa | 1.25 |
| 62 | DnaJ homolog subfamily C member 25<br>OS=Rattus norvegicus GN=Dnajc25 PE=2<br>SV=1                                                  | DJC25_RAT | 42 kDa | 1.25 |
| 63 | ER membrane protein complex subunit 8<br>OS=Rattus norvegicus GN=Emc8 PE=2<br>SV=1                                                  | EMC8_RAT  | 23 kDa | 1.25 |
| 64 | Glutamate--cysteine ligase regulatory subunit<br>OS=Rattus norvegicus GN=Gclm PE=1<br>SV=1                                          | GSH0_RAT  | 31 kDa | 1.25 |
| 65 | Small ubiquitin-related modifier 3 OS=Rattus<br>norvegicus GN=Sumo3 PE=3 SV=1                                                       | SUMO3_RAT | 12 kDa | 1.25 |
| 66 | Leucine-rich repeat flightless-interacting<br>protein 1 OS=Rattus norvegicus GN=Lrrfip1<br>PE=1 SV=1                                | LRRF1_RAT | 80 kDa | 1.20 |
| 67 | 40S ribosomal protein S12 OS=Rattus<br>norvegicus GN=Rps12 PE=1 SV=2                                                                | RS12_RAT  | 15 kDa | 1.20 |
| 68 | Serine/threonine-protein phosphatase 2A 65<br>kDa regulatory subunit A beta isoform<br>OS=Rattus norvegicus GN=Ppp2r1b PE=2<br>SV=1 | 2AAB_RAT  | 66 kDa | 1.20 |
| 69 | Acyl-protein thioesterase 2 OS=Rattus<br>norvegicus GN=Lypla2 PE=1 SV=1                                                             | LYPA2_RAT | 25 kDa | 1.20 |
| 70 | Phosducin-like protein 3 OS=Rattus<br>norvegicus GN=Pdcl3 PE=2 SV=1                                                                 | PDCL3_RAT | 28 kDa | 1.20 |
| 71 | Dihydrofolate reductase OS=Rattus<br>norvegicus GN=Dhfr PE=2 SV=3                                                                   | DYR_RAT   | 22 kDa | 1.20 |
| 72 | Alkylidihydroxyacetonephosphate synthase,<br>peroxisomal OS=Rattus norvegicus<br>GN=Agps PE=2 SV=1                                  | ADAS_RAT  | 72 kDa | 1.20 |
| 73 | Arylsulfatase B OS=Rattus norvegicus                                                                                                | ARSB_RAT  | 59 kDa | 1.20 |

|    |                                                                                                  |               |        |      |
|----|--------------------------------------------------------------------------------------------------|---------------|--------|------|
|    | GN=Arsb PE=2 SV=2                                                                                |               |        |      |
| 74 | 60S ribosomal protein L36 OS=Rattus norvegicus GN=Rpl36 PE=1 SV=2                                | RL36_RAT      | 12 kDa | 1.20 |
| 75 | Malignant T-cell-amplified sequence 1 OS=Rattus norvegicus GN=Mcts1 PE=2 SV=1                    | MCTS1_RAT     | 21 kDa | 1.20 |
| 76 | Calcium-binding mitochondrial carrier protein SCaMC-2 OS=Rattus norvegicus GN=Slc25a25 PE=1 SV=1 | SCMC2_RAT     | 53 kDa | 1.20 |
| 77 | V-type proton ATPase subunit F OS=Rattus norvegicus GN=Atp6v1f PE=1 SV=1                         | VATF_RAT      | 13 kDa | 1.20 |
| 78 | PEST proteolytic signal-containing nuclear protein OS=Rattus norvegicus GN=Pcnp PE=2 SV=1        | PCNP_RAT      | 20 kDa | 1.20 |
| 79 | Protein disulfide-isomerase OS=Rattus norvegicus GN=P4hb PE=1 SV=2                               | PDIA1_RAT     | 57 kDa | 1.20 |
| 80 | 78 kDa glucose-regulated protein OS=Rattus norvegicus GN=Hspa5 PE=1 SV=1                         | GRP78_RAT     | 72 kDa | 1.20 |
| 81 | 40S ribosomal protein S3a OS=Rattus norvegicus GN=Rps3a PE=1 SV=2                                | RS3A_RAT      | 30 kDa | 1.20 |
| 82 | Custer of Ras-related protein Rab-1A OS=Rattus norvegicus GN=Rab1A PE=1 SV=3 (RAB1A_RAT)         | RAB1A_RAT [2] | 23 kDa | 1.20 |
| 83 | Farnesyl pyrophosphate synthase OS=Rattus norvegicus GN=Fdps PE=2 SV=2                           | FPPS_RAT      | 41 kDa | 1.20 |
| 84 | 40S ribosomal protein S16 OS=Rattus norvegicus GN=Rps16 PE=1 SV=2                                | RS16_RAT      | 16 kDa | 1.20 |
| 85 | 40S ribosomal protein S18 OS=Rattus norvegicus GN=Rps18 PE=1 SV=3                                | RS18_RAT      | 18 kDa | 1.20 |
| 86 | 40S ribosomal protein S11 OS=Rattus norvegicus GN=Rps11 PE=1 SV=3                                | RS11_RAT      | 18 kDa | 1.20 |
| 87 | Transforming protein RhoA OS=Rattus norvegicus GN=Rhoa PE=1 SV=1                                 | RHOA_RAT      | 22 kDa | 1.20 |
| 88 | Tubulin-specific chaperone A OS=Rattus norvegicus GN=Tbca PE=1 SV=1                              | TBCA_RAT      | 13 kDa | 1.20 |
| 89 | Transcriptional activator protein Pur-beta OS=Rattus norvegicus GN=Purb PE=1 SV=3                | PURB_RAT      | 33 kDa | 1.20 |
| 90 | 60S ribosomal protein L10a OS=Rattus norvegicus GN=Rpl10a PE=1 SV=2                              | RL10A_RAT     | 25 kDa | 1.20 |
| 91 | 60S ribosomal protein L11 OS=Rattus norvegicus GN=Rpl11 PE=1 SV=2                                | RL11_RAT      | 20 kDa | 1.20 |
| 92 | 40S ribosomal protein S20 OS=Rattus norvegicus GN=Rps20 PE=3 SV=1                                | RS20_RAT      | 13 kDa | 1.20 |
| 93 | Procollagen C-endopeptidase enhancer 1                                                           | PCOC1_RAT     | 50 kDa | 1.20 |

|     |                                                                                                 |           |        |      |
|-----|-------------------------------------------------------------------------------------------------|-----------|--------|------|
|     | OS=Rattus norvegicus GN=Pcolce PE=1 SV=1                                                        |           |        |      |
| 94  | 60S ribosomal protein L17 OS=Rattus norvegicus GN=Rpl17 PE=2 SV=3                               | RL17_RAT  | 21 kDa | 1.20 |
| 95  | Phosphatidylinositol-binding clathrin assembly protein OS=Rattus norvegicus GN=Picalm PE=1 SV=1 | PICAL_RAT | 69 kDa | 1.20 |
| 96  | Translocon-associated protein subunit alpha OS=Rattus norvegicus GN=Ssr1 PE=2 SV=1              | SSRA_RAT  | 36 kDa | 1.20 |
| 97  | Protein FAM98A OS=Rattus norvegicus GN=Fam98a PE=2 SV=1                                         | FA98A_RAT | 55 kDa | 1.20 |
| 98  | Follistatin-related protein 1 OS=Rattus norvegicus GN=Fstl1 PE=1 SV=1                           | FSTL1_RAT | 35 kDa | 1.20 |
| 99  | Cytosolic phospholipase A2 OS=Rattus norvegicus GN=Pla2g4a PE=2 SV=1                            | PA24A_RAT | 86 kDa | 1.20 |
| 100 | Protein phosphatase methylesterase 1 OS=Rattus norvegicus GN=Ppme1 PE=1 SV=2                    | PPME1_RAT | 42 kDa | 1.20 |
| 101 | Cysteine-rich protein 2 OS=Rattus norvegicus GN=Crip2 PE=2 SV=1                                 | CRIP2_RAT | 23 kDa | 1.20 |
| 102 | 40S ribosomal protein S17 OS=Rattus norvegicus GN=Rps17 PE=1 SV=3                               | RS17_RAT  | 16 kDa | 1.20 |
| 103 | Phosphoserine phosphatase OS=Rattus norvegicus GN=Psph PE=2 SV=1                                | SERB_RAT  | 25 kDa | 1.20 |
| 104 | Cystathionine gamma-lyase OS=Rattus norvegicus GN=Cth PE=1 SV=2                                 | CGL_RAT   | 44 kDa | 1.20 |
| 105 | Glia maturation factor beta OS=Rattus norvegicus GN=Gmfβ PE=1 SV=2                              | GMFB_RAT  | 17 kDa | 1.20 |
| 106 | Prothrombin OS=Rattus norvegicus GN=F2 PE=1 SV=1                                                | THRB_RAT  | 70 kDa | 1.20 |
| 107 | Calcyclin-binding protein OS=Rattus norvegicus GN=Cacybp PE=1 SV=1                              | CYBP_RAT  | 27 kDa | 1.20 |
| 108 | 3-hydroxyisobutyryl-CoA hydrolase, mitochondrial OS=Rattus norvegicus GN=Hibch PE=1 SV=2        | HIBCH_RAT | 43 kDa | 1.20 |
| 109 | 40S ribosomal protein S24 OS=Rattus norvegicus GN=Rps24 PE=2 SV=1                               | RS24_RAT  | 15 kDa | 1.20 |
| 110 | Pyridoxal kinase OS=Rattus norvegicus GN=Pdxk PE=1 SV=1                                         | PDXK_RAT  | 35 kDa | 1.20 |
| 111 | Sodium/potassium-transporting ATPase subunit beta-1 OS=Rattus norvegicus GN=Atp1b1 PE=1 SV=1    | AT1B1_RAT | 35 kDa | 1.20 |
| 112 | ER membrane protein complex subunit 3 OS=Rattus norvegicus GN=Emc3 PE=2                         | EMC3_RAT  | 30 kDa | 1.20 |

|     |                                                                                              |           |        |      |
|-----|----------------------------------------------------------------------------------------------|-----------|--------|------|
|     | SV=3                                                                                         |           |        |      |
| 113 | 40S ribosomal protein S28 OS=Rattus norvegicus GN=Rps28 PE=1 SV=1                            | RS28_RAT  | 8 kDa  | 1.20 |
| 114 | Cell growth regulator with EF hand domain protein 1 OS=Rattus norvegicus GN=Cgrefl PE=1 SV=1 | CGRE1_RAT | 31 kDa | 1.20 |
| 115 | 40S ribosomal protein S27 OS=Rattus norvegicus GN=Rps27 PE=2 SV=3                            | RS27_RAT  | 9 kDa  | 1.20 |



**Table S3. GO analysis of differential proteins performed in PANTHER and classified based on molecular function**

| <b>molecular function</b>                      |    | <b>Up-regulated proteins</b>                                                                                                                                                                                                              |    | <b>Down-regulated proteins</b>                                                                                                                                                      |
|------------------------------------------------|----|-------------------------------------------------------------------------------------------------------------------------------------------------------------------------------------------------------------------------------------------|----|-------------------------------------------------------------------------------------------------------------------------------------------------------------------------------------|
| catalytic activity<br>(GO:0003824)             | 37 | PDCL3; LYOX; TANC1; GMFB; CGL; FPPS; VATF; PDIA1; PCOC1; PPME1; ARHG6; LYPA2; SERB; TPM2; PDXK; ARSB; ERG1; ORN; EI2BG; RHOA; HIBCH; CK5P3; 2AAB; METK2; GFPT2; DYR; THRB; MAGI3; PAI1; PA24A; CYBP; ARFG1; ADAS; ATIF1; IPP2; GSH0; GNL3 | 28 | KIF1B; SMC1A; THTM; MRCKA; CAV1; BST1; CATL1; AL3A1; CATA; RPN2; CN37; CTHR1; LPP3; DHI1; PSME2; RASA1; COX7C; LPP1; P85A; GLO2; MAGT1; AAK1; BZW2; APOE; MYO1B; HXK1; NT5D2; HMGCL |
| binding<br>(GO:0005488)                        | 24 | GMFB; FGF2; CRIP2; SSRA; PCOC1; PAIRB; ARHG6; RL10A; S10AB; SERB; PURB; EI2BG; LRRF1; RHOA; FSTL1; CYR61; OLR1; TCTP; ARFG1; CHSP1; RS13; ATIF1; RL35A; YKT6                                                                              | 18 | SMC1A; CAV1; CATA; ADDG; MARE2; DTNB; H2AY; SQSTM; P85A; SPTN2; IBP5; AAK1; ADDA; C2D1A; APOE; H4; MYO1B; WNT5A                                                                     |
| structural molecule activity<br>(GO:0005198)   | 19 | RL11; RS11; CRIP2; RS20; RS12; RS28; RS16; RL10A; RS27; SCMC2; TPM2; RS18; RL23A; RL36; RL26; RS19; TCTP; RS13; RL35A                                                                                                                     | 14 | CAV1; M2OM; K2C1; ADDG; MGP; COL12; MARE2; DTNB; K2C4; MCAT; SPTN2; ADDA; MYO1B; MPCP                                                                                               |
| transporter activity<br>(GO:0005215)           | 4  | CGRE1; VATF; PCOC1; AT1B1                                                                                                                                                                                                                 | 7  | VDAC2; PLS3; SFXN3; VDAC3; ABCD3; APOE; CXA1                                                                                                                                        |
| receptor activity<br>(GO:0004872)              | 3  | LYOX; PCOC1; MCTS1                                                                                                                                                                                                                        | 4  | NTRI; ANTR1; MEP50; TPBG                                                                                                                                                            |
| translation regulator activity<br>(GO:0045182) | 1  | EI2BG                                                                                                                                                                                                                                     | 2  | PDCD4; BZW2                                                                                                                                                                         |
| antioxidant activity                           | 0  |                                                                                                                                                                                                                                           | 1  | CATA                                                                                                                                                                                |

**Table S4. GO analysis of differential proteins performed in PANTHER and classified based on biological process**

| biological process                                            |    | Up-regulation proteins                                                                                                                                                                                                                                                                                                                                                          |    | Down-regulation proteins                                                                                                                                                                                                                                                            |
|---------------------------------------------------------------|----|---------------------------------------------------------------------------------------------------------------------------------------------------------------------------------------------------------------------------------------------------------------------------------------------------------------------------------------------------------------------------------|----|-------------------------------------------------------------------------------------------------------------------------------------------------------------------------------------------------------------------------------------------------------------------------------------|
| cellular process<br>(GO:0009987)                              | 51 | GNL3; RL11; LYOX; RS11; RB27A; FPPS; FGF2; VATF;<br>PDIA1; PCOC1; PZRN3; RS28; ARHG6; ARHG6; RS16;<br>LYPA2; RS16; LYPA2; GRB10; RS27; S10AB; SERB;<br>SCMC2; RS17; TPM2; RAB1A; RS18; RL23A; PDXK;<br>SUMO2; ORN; RL36; RHOA; RL26; GFPT2; CYR61;<br>MCTS1; MAGI3; RS19; SDC2; OLR1; AREG1; CHSP1;<br>PHF5A; RS13; ATIF1; SUMO3; RN181; IPP2; RL35A; YKT6;<br>EMC3; GSH0; GNL3 | 42 | TBCE; KIF1B; SMC1A; MRCKA; CAV1; M2OM; BST1;<br>CATL1; PLS3; NTRI; CATA; SLIT3; K2C1; RPN2; CTHR1;<br>LPP3; COL12; MARE2; DTNB; H2AY; K2C4; SQSTM;<br>RASA1; LPP1; MEP50; MCAT; SPTN2; IBP5; TPBG; AAK1;<br>C2D1A; APOE; H4; MYO1B; HXK1; CXA1; MPCP; NT5D2;<br>SLIT2; WNT5A; PLXA3 |
| metabolic process<br>(GO:0008152)                             | 50 | PDCL3; RL11; LYOX; RS11; CGL; FPPS; CRIP2; TBCA;<br>VATF; SSRA; PCOC1; PAIRB; PPME1; RS16; RL10A;<br>LYPA2; RS27; S10AB; SERB; SCMC2; PURB; RS17; RS18;<br>RL23A; PDXK; SUMO2; ARSB; ORN; EI2BG; RL36;<br>LRRF1; HIBCH; CK5P3; RL26; GFPT2; THRB; PA24A;<br>CYBP; CHSP1; PHF5A; ADAS; RS13; ATIF1; SUMO3;<br>RN181; IPP2; RL35A; EMC3; GSH0; GNL3                               | 29 | KIF1B; SMC1A; THTM; CAV1; M2OM; CATL1; CATA;<br>RPN2; LPP3; DHI1; H2AY; PSME2; SQSTM; RASA1;<br>ABCD3; COX7C; LPP1; MEP50; P85A; MCAT;                                                                                                                                              |
| cellular component organization or biogenesis<br>(GO:0071840) | 16 | RL11; CRIP2; PZRN3; RS28; RS16; RS27; RS17; TPM2;<br>RS18; RL23A; RL23A; RL26; RS19; SDC2; RL35A; YKT6;<br>GNL3                                                                                                                                                                                                                                                                 | 20 | TBCE; SMC1A; PLS3; SLIT3; K2C1; ADDG; CTHR1;<br>COL12; MARE2; DTNB; H2AY; K2C4; MEP50; AAK1;<br>ADDA; APOE; H4; MYO1B; SLIT2; PLXA3;                                                                                                                                                |
| multicellular organismal process                              | 15 | CO2A1; PCOC1; PZRN3; ARHG6; COBA1; TPM2; CO3A1;<br>SFTPA; MAGI3; HBB1; CO5A1; SDC2; HBA; CO1A1;<br>CO1A2                                                                                                                                                                                                                                                                        | 7  | SLIT3; ADA10; APOE; MYO1B; SLIT2; WNT5A; PLXA3                                                                                                                                                                                                                                      |

|                                          |    |                                                                                           |    |                                                                                                   |  |
|------------------------------------------|----|-------------------------------------------------------------------------------------------|----|---------------------------------------------------------------------------------------------------|--|
| (GO:0032501)                             |    |                                                                                           |    |                                                                                                   |  |
| localization<br>(GO:0051179)             | 14 | LYOX; RB27A; PICAL; CGRE1; VATF; SSRA; PCOC1;<br>RS28; RAB1A; RHOA; HBB1; SDC2; YKT6; HBA | 14 | KIF1B; THTM; CAV1; VDAC2; PLS3; ALBU; TMED2;<br>VDAC3; ABCD3; MEP50; AAK1; APOE; MYO1B; PLXA3     |  |
| developmental<br>process<br>(GO:0032502) | 13 | CO2A1; GMFB; FGF2; CRIP2; PDIA1; PCOC1; PZRN3;<br>COBA1; TPM2; CYR61; SDC2; CO1A2         | 12 | MRCKA; NTRI; SLIT3; PDCD4; ADA10; COL12; SPTN2;<br>APOE; MYO1B; SLIT2; WNT5A; PLXA3               |  |
| immune system<br>process<br>(GO:0002376) | 12 | LYOX; CRIP2; PCOC1; ARHG6; COBA1; S10AB; CO3A1;<br>SFTPA; CO5A1; PA24A; OLR1; CO1A1       | 4  | BST1; COL12; PSME2; GLO2                                                                          |  |
| biological<br>regulation<br>(GO:0065007) | 9  | LYOX; RB27A; CRIP2; PDIA1; CK5P3; SFTPA; CYR61;<br>PAI1; GSH0                             | 14 | BST1; PLS3; LPP3; H2AY; PSME2; SQSTM; LPP1; IBP5;<br>AAK1; APOE; HXK1; SLIT2; WNT5A; PLXA3        |  |
| response to<br>stimulus<br>(GO:0050896)  | 7  | CGRE1; CRIP2; PDIA1; PCOC1; ARHG6; CYR61; THRB                                            | 15 | THTM; CATA; LPP3; PSME2; SQSTM; RASA1; LPP1;<br>P85A; GLO2; IBP5; AAK1; APOE; SLIT2; WNT5A; PLXA3 |  |
| biological<br>adhesion<br>(GO:0022610)   | 4  | LYOX; PCOC1; PLOD2; CYR61                                                                 | 2  | CTHR1; COL12                                                                                      |  |
| locomotion<br>(GO:0040011)               | 1  | SDC2                                                                                      | 2  | SLIT2; PLXA3                                                                                      |  |
| reproduction<br>(GO:0000003)             | 1  | CRIP2                                                                                     | 1  | ADA10                                                                                             |  |

**Table S5. GO analysis of differential proteins performed in PANTHER and classified based on cellular component**

| <b>cellular component</b>              |    | <b>Up-regulation proteins</b>                                                                                                                                                                                                                                                             |    | <b>Down-regulation proteins</b>                                                                                                                    |
|----------------------------------------|----|-------------------------------------------------------------------------------------------------------------------------------------------------------------------------------------------------------------------------------------------------------------------------------------------|----|----------------------------------------------------------------------------------------------------------------------------------------------------|
| cell part<br>(GO:0044464)              | 43 | PDCL3; RL11; RS11; RB27A; PICAL; FPPS; CRIP2; RS20; RS12; NOLC1; RS28; RS16; FA98A; FA98A; LYPA2; RS27; SERB; RS17; TPM2; RAB1A; RS18; RL36A; RL23A; PDXK; SUMO2; RL36; CK5P3; RL26; METK2; RS19; SDC2; PA24A; TCTP; PHF5A; RS13; ATIF1; SUMO3; IPP2; RL35A; YKT6; EMC3; GSH0; RS3A; GNL3 | 23 | KIF1B; CATL1; CATA; K2C1; RPN2; RM37; ADDG; CN37; MARE2; DTNB; TMED2; H2AY; K2C4; PSME2; SQSTM; RASA1; P85A; SPTN2; AAK1; ADDA; C2D1A; MYO1B; HXK1 |
| organelle<br>(GO:0043226)              | 26 | RL11; RS11; RB27A; RS20; RS12; NOLC1; RS28; RS16; RS27; RS17; RAB1A; RS18; RL36A; RL23A; SUMO2; RL36; RL26; RS19; TCTP; PHF5A; RS13; ATIF1; SUMO3; RL35A; EMC3; GNL3                                                                                                                      | 15 | KIF1B; CATL1; K2C1; RPN2; RM37; ADDG; MARE2; DTNB; H2AY; K2C4; PSME2; SQSTM; ADDA; C2D1A; MYO1B                                                    |
| macromolecular complex<br>(GO:0032991) | 24 | RL11; RS11; PICAL; RS20; RS12; RS28; RS16; FA98A; RS27; RS17; RS18; RL36A; RL23A; RL36; RL26; METK2; RS19; PHF5A; RS13; IPP2; RL35A; YKT6; EMC3; GSH0                                                                                                                                     | 6  | KIF1B; RPN2; TMED2; PSME2; P85A; APOE                                                                                                              |
| membrane<br>(GO:0016020)               | 4  | RAB1A; MAGI3; YKT6; EMC3                                                                                                                                                                                                                                                                  | 8  | BST1; PLS3; RPN2; LPP3; RASA1; LPP1; MYO1B; CXA1                                                                                                   |
| extracellular region<br>(GO:0005576)   | 3  | PCOC1; CYR61; PAI1                                                                                                                                                                                                                                                                        | 6  | CATL1; COL12; IBP5; TPBG; APOE; WNT5A                                                                                                              |
| extracellular matrix<br>(GO:0031012)   | 2  | PCOC1; CYR61                                                                                                                                                                                                                                                                              |    | MMP2; CTHR1; COL12                                                                                                                                 |
| cell junction<br>(GO:0030054)          | 1  | MAGI3                                                                                                                                                                                                                                                                                     | 1  | MYO1B                                                                                                                                              |
| synapse<br>(GO:0045202)                | 1  | PZRN3                                                                                                                                                                                                                                                                                     | 0  |                                                                                                                                                    |

**Table S6. Protein class ontology analysis of differential proteins performed in PANTHER**

| <b>protein class</b>               |    | <b>Up-regulation proteins</b>                                                                                                                                                          |   | <b>Down-regulation proteins</b>                          |
|------------------------------------|----|----------------------------------------------------------------------------------------------------------------------------------------------------------------------------------------|---|----------------------------------------------------------|
| nucleic acid binding (PC00171)     | 29 | RL11; RS11; CRIP2; RS20; RS12; PAIRB; RS28; RS16; RL10A; RS27; SCMC2; PURB; RS17; RS18; RL36A; RL23A; ORN; EI2BG; RL36; LRRF1; RL26; RS24; RS19; ARFG1; CHSP1; RS13; RL35A; RS3A; GNL3 | 9 | SMC1A; M2OM; PDCD4; UBF1; H2AY; MCAT; BZW2; H4; MPCP     |
| hydrolase (PC00121)                | 12 | LYOX; PCOC1; VCAM1; PPME1; LYP A2; SERB; ARSB; ORN; 2AAB; THRB; PA24A; GNL3;                                                                                                           | 9 | SMC1A; BST1; CATL1; CN37; LPP3; LPP1; GLO2; CNTN2; NT5D2 |
| enzyme modulator (PC00095)         | 11 | PDCL3; GMFB; PCOC1; ARHG6; EI2BG; RHOA; FSTL1; PAI1; ARFG1; IPP2; GNL3                                                                                                                 | 4 | CAV1; RASA1; P85A; MYO1B                                 |
| signalling molecule (PC00207)      | 9  | GMFB; FGF2; PCOC1; ARHG6; S10AB; CYR61; SDC2; OLR1; GNL3                                                                                                                               | 4 | MGP; UBF1; WNT5A; PLXA3                                  |
| transferase (PC00220)              | 8  | TANC1; FPPS; PDXK; EI2BG; HIBCH; METK2; GFPT2; MAGI3                                                                                                                                   | 6 | THTM; MRCKA; RPN2; MAGT1; AAK1; HMGCL                    |
| oxidoreductase (PC00176)           | 6  | LYOX; PCOC1; ERG; HIBCH; DYR; ADAS                                                                                                                                                     | 5 | AL3A1; CATA; CTHR1; DHI1; COX7C                          |
| receptor (PC00197)                 | 5  | LYOX; PCOC1; VCAM1; MCTS1; VLDLR                                                                                                                                                       | 6 | NTRI; ANTR1; MEP50; TPBG; CNTN2; PLXA3                   |
| cytoskeletal protein (PC00085)     | 4  | CRIP2; TPM2; SDC2; TCTP                                                                                                                                                                | 9 | KIF1B; K2C1; ADDG; MARE2; DTNB; K2C4; SPTN2; ADDA; MYO1B |
| ligase (PC00142)                   | 4  | HIBCH; CYBP; ATIF1; GSH0                                                                                                                                                               | 0 |                                                          |
| transfer/carrier protein (PC00219) | 4  | PCOC1; SCMC2; HBB1; HBA                                                                                                                                                                | 8 | THTM; M2OM; PLS3; ALBU; SFXN3; TMED2; MCAT; MPCP         |
| transporter (PC00227)              | 4  | CGRE1; PCOC1; SCMC2; AT1B1                                                                                                                                                             | 7 | M2OM; VDAC2; SFXN3; VDAC3; ABCD3; MCAT; MPCP             |
| calcium-binding protein (PC00060)  | 3  | SSRA; S10AB; SCMC2                                                                                                                                                                     | 4 | M2OM; MGP; MCAT; MPCP                                    |

|                                                             |   |                    |   |                       |
|-------------------------------------------------------------|---|--------------------|---|-----------------------|
| cell adhesion molecule (PC00069)                            | 3 | PCOC1; VCAM1; SDC2 | 1 | CNTN2                 |
| defence/immunity protein (PC00090)                          | 3 | VCAM1; SFTPA; SDC2 | 1 | CNTN2                 |
| extracellular matrix protein (PC00102)                      | 3 | PCOC1; SDC2; VLDLR | 3 | MGP; COL12; TPBG      |
| membrane traffic protein (PC00150)                          | 3 | PICAL; SSRA; YKT6  | 2 | CAV1; TMED2           |
| transcription factor (PC00218)                              | 3 | CRIP2; PURB; LRRF1 | 1 | UBF1                  |
| chaperone (PC00072)                                         | 2 | PDCL3; TBCA        | 1 | TBCE                  |
| lyase (PC00144)                                             | 2 | CGL; HIBCH         | 2 | BST1; HMGCL           |
| cell junction protein (PC00070)                             | 1 | MAGI3              | 2 | MYO1B; CXA1           |
| isomerase (PC00135)                                         | 1 | HIBCH              | 0 |                       |
| surfactant (PC00212)                                        | 1 | SFTPA              | 0 |                       |
| transmembrane receptor regulatory/adaptor protein (PC00226) | 1 | GRB10              | 1 | CAV1                  |
| structural protein (PC00211)                                | 0 |                    | 4 | CAV1; K2C1; MGP; K2C4 |

**Table S7. Pathway analysis of differential proteins performed in PANTHER**

| Pathway analysis                                                                            | Up-regulation proteins                                  | Down-regulation proteins |
|---------------------------------------------------------------------------------------------|---------------------------------------------------------|--------------------------|
| Integrin signalling pathway (P00034)                                                        | 8 CO2A1; COBA1; CO3A1; RHOA; CO5A1; ARFG1; CO1A1; CO1A2 | 2 CAV1; P85A             |
| Angiogenesis (P00005)                                                                       | 4 FGF2; PAR1; RHOA; PA24A                               | 3 RASA1; P85A; WNT5A     |
| Blood coagulation (P00011)                                                                  | 3 PAR1; THRB; PAI1                                      | 0                        |
| CCKR signalling map (P06959)                                                                | 3 RHOA; PAI1; PA24A                                     | 1 P85A                   |
| Cholesterol biosynthesis (P00014)                                                           | 3 FPPS; FDFT; ERG1                                      | 0                        |
| p53 pathway (P00059)                                                                        | 3 SUMO2; PAI1; SUMO3                                    | 1 P85A                   |
| FGF signalling pathway (P00021)                                                             | 2 FGF2; 2AAB                                            | 1 RASA1                  |
| Gonadotropin-releasing hormone receptor pathway (P06664)                                    | 2 GTR1; PA24A                                           | 2 CAV1; P85A             |
| Inflammation mediated by chemokine and cytokine signalling pathway (P00031)                 | 2 RHOA; PA24A                                           | 0                        |
| Alzheimer disease-presenilin pathway (P00004)                                               | 1 FSTL1                                                 | 2 MMP2; WNT5A            |
| Angiotensin II-stimulated signalling through G proteins and beta-arrestin (P05911)          | 1 RHOA                                                  | 0                        |
| Apoptosis signalling pathway (P00006)                                                       | 1 GRP78                                                 | 0                        |
| Axon guidance mediated by semaphorins (P00007)                                              | 1 RHOA                                                  | 0                        |
| Cadherin signalling pathway (P00012)                                                        | 1 FSTL1                                                 | 2 CSK21; WNT5A           |
| Endothelin signalling pathway (P00019)                                                      | 1 PA24A                                                 | 1 P85A                   |
| Formyltetrahydroformate biosynthesis (P02743)                                               | 1 DYR                                                   | 0                        |
| Heterotrimeric G-protein signalling pathway-Gq alpha and Go alpha mediated pathway (P00027) | 1 RHOA                                                  | 0                        |

|                                                                                         |   |       |                |
|-----------------------------------------------------------------------------------------|---|-------|----------------|
| Methionine biosynthesis (P02753)                                                        | 1 | CGL   | 0              |
| N-acetylglucosamine metabolism (P02756)                                                 | 1 | GFPT2 | 0              |
| O-antigen biosynthesis (P02757)                                                         | 1 | GFPT2 | 0              |
| Oxidative stress response (P00046)                                                      | 1 | PA24A | 0              |
| Parkinson disease (P00049)                                                              | 1 | GRP78 | 1 CSK21        |
| Plasminogen activating cascade (P00050)                                                 | 1 | PAI1  | 0              |
| Pyridoxal phosphate salvage pathway (P02770)                                            | 1 | PDXK  | 0              |
| Ras Pathway (P04393)                                                                    | 1 | RHOA  | 0              |
| S-adenosylmethionine biosynthesis (P02773)                                              | 1 | METK2 | 0              |
| Serine glycine biosynthesis (P02776)                                                    | 1 | SERB  | 0              |
| Tetrahydrofolate biosynthesis (P02742)                                                  | 1 | DYR   | 0              |
| VEGF signalling pathway (P00056)                                                        | 1 | PA24A | 1 P85A         |
| Vitamin B6 metabolism (P02787)                                                          | 1 | PDXK  | 0              |
| Wnt signalling pathway (P00057)                                                         | 1 | FSTL1 | 0              |
| 5-Hydroxytryptamine degradation (P04372)                                                | 0 |       | 1 AL3A1        |
| Alzheimer disease-amyloid secretase pathway (P00003)                                    | 0 |       | 1 ADA10        |
| Axon guidance mediated by Slit/Robo (P00008)                                            | 0 |       | 2 SLIT3; SLIT2 |
| Axon guidance mediated by netrin (P00009)                                               | 0 |       | 1 P85A         |
| Cell cycle (P00013)                                                                     | 0 |       | 1 PSME2        |
| EGF receptor signalling pathway (P00018)                                                | 0 |       | 1 RASA1        |
| Fructose galactose metabolism (P02744)                                                  | 0 |       | 1 HXK1         |
| General transcription by RNA polymerase I (P00022)                                      | 0 |       | 1 UBF1         |
| Glycolysis (P00024)                                                                     | 0 |       | 1 HXK1         |
| Hypoxia response via HIF activation (P00030)                                            | 0 |       | 1 P85A         |
| Insulin/IGF pathway-mitogen activated protein kinase kinase/MAP kinase cascade (P00032) | 0 |       | 1 RASA1        |



|                                                                  |   |   |              |
|------------------------------------------------------------------|---|---|--------------|
| Insulin/IGF pathway-protein kinase B signalling cascade (P00033) | 0 | 1 | P85A         |
| Nicotinic acetylcholine receptor signalling pathway (P00044)     | 0 | 1 | MYO1B        |
| Notch signalling pathway (P00045)                                | 0 | 1 | ADA10        |
| PDGF signalling pathway (P00047)                                 | 0 | 2 | RASA1; P85A  |
| PI3 kinase pathway (P00048)                                      | 0 | 1 | P85A         |
| Pentose phosphate pathway (P02762)                               | 0 | 1 | H XK1        |
| T cell activation (P00053)                                       | 0 | 1 | P85A         |
| VEGF signalling pathway (P00056)                                 | 0 | 1 | P85A         |
| Wnt signalling pathway (P00057)                                  | 0 | 2 | CSK21; WNT5A |
| p53 pathway feedback loops 2 (P04398)                            | 0 | 1 | P85A         |
